# Supplementary material for: Structural chemistry of decalins and perfluorodecalins
Source: Royal Society of Chemistry journal article supplement (doi:10.1039/d3ce01117h), 2024-01-01
Supplement: d3ce01117h1.pdf [file d3ce01117h1.pdf]

# Structural chemistry of decalins and perfluorodecalins

## ESI

Bartłomiej Paska<sup>1</sup>, Grzegorz Cichowicz<sup>1</sup>, Patryk Rzepiński<sup>1</sup>,  
Michał Ksawery Cyrański<sup>1</sup>, Łukasz Dobrzycki<sup>1\*</sup>, Roland Boese<sup>2\*</sup>

- <sup>1</sup> Laboratory of Advanced Crystal Engineering, Faculty of Chemistry, University of Warsaw, Żwirki i Wigury 101, 02-089 Warsaw, Poland
- <sup>2</sup> CEO at SOLID-CHEM GmbH, Universitätsstr. 136, 44799 Bochum, Germany

\*Corresponding authors e-mails: [lm.dobrzycki@gmail.com](mailto:lm.dobrzycki@gmail.com), [prof.boese@gmail.com](mailto:prof.boese@gmail.com)

The Coding scheme of some of obtained crystalline phases is presented below.

| Code                          | Meaning                                                                                                                                                                                                                                 |
|-------------------------------|-----------------------------------------------------------------------------------------------------------------------------------------------------------------------------------------------------------------------------------------|
| <b>t_pFDec_k200K_100K</b>     | Perfluorodecalin ( <b>pFDec</b> ), isomer <i>trans</i> ( <b>t</b> ), crystallized at 200K ( <b>k200K</b> ), measured at 100K ( <b>100K</b> )                                                                                            |
| <b>t_pFDec_k200K_290K_II</b>  | Perfluorodecalin ( <b>pFDec</b> ), isomer <i>trans</i> ( <b>t</b> ), crystallized at 200K ( <b>k200K</b> ), measured at 290K ( <b>290K</b> ), attempt 2 ( <b>II</b> )                                                                   |
| <b>t_pFDec_Br2_k200K_200K</b> | Perfluorodecalin ( <b>pFDec</b> ), isomer <i>trans</i> ( <b>t</b> ), Br <sub>2</sub> solution ( <b>Br2</b> ), crystallized at 200K ( <b>k200K</b> ), measured at 200K ( <b>200K</b> )                                                   |
| <b>ct_pFDec_k230K_100K</b>    | Perfluorodecalin ( <b>pFDec</b> ), mixture of <i>cis</i> , <i>trans</i> isomers ( <b>ct</b> ), crystallized at 230K ( <b>k230K</b> ), measured at 100K ( <b>100K</b> )                                                                  |
| <b>c_pFDec_k200K_260K</b>     | Perfluorodecalin ( <b>pFDec</b> ), isomer <i>cis</i> ( <b>c</b> ), crystallized at 200K ( <b>k200K</b> ), measured at 260K ( <b>260K</b> )                                                                                              |
| <b>t_Dec_k200K_100K</b>       | Decalin ( <b>Dec</b> ), isomer <i>trans</i> ( <b>t</b> ), crystallized at 200K ( <b>k200K</b> ), measured at 100K ( <b>100K</b> )                                                                                                       |
| <b>c_Dec_k180K_100K_cd_aP</b> | Decalin ( <b>Dec</b> ), isomer <i>cis</i> ( <b>c</b> ), crystallized at 180K ( <b>k180K</b> ), measured at 100K ( <b>100K</b> ), after cooling ( <b>cd</b> ), solved in triclinic crystal system ( <b>aP</b> )                          |
| <b>c_Dec_k180K_220K_hu_ml</b> | Decalin ( <b>Dec</b> ), isomer <i>cis</i> ( <b>c</b> ), crystallized at 180K ( <b>k180K</b> ), measured at 220K ( <b>220K</b> ), after heating ( <b>hu</b> ), solved in monoclinic crystal system, centered cell <i>I</i> ( <b>mI</b> ) |

**Table S1.** Crystal data and refinement parameters for obtained phases.

| Name                                            | t_pFDec_k200K_100K                                                                                                                                     | t_pFDec_k200K_200K                                                                                                                                     | t_pFDec_k200K_290K_II                                                                                                                                   | t_pFDec_Br2_k200K_100K                                                                                                                                       | t_pFDec_Br2_k200K_200K                                                                                                                                       |
|-------------------------------------------------|--------------------------------------------------------------------------------------------------------------------------------------------------------|--------------------------------------------------------------------------------------------------------------------------------------------------------|---------------------------------------------------------------------------------------------------------------------------------------------------------|--------------------------------------------------------------------------------------------------------------------------------------------------------------|--------------------------------------------------------------------------------------------------------------------------------------------------------------|
| Compound used for crystallization               | Isomer <i>trans</i> at 200K                                                                                                                            | Isomer <i>trans</i> at 200K                                                                                                                            | Isomer <i>trans</i> at 200K                                                                                                                             | <i>trans</i> -Perfluorodecalin, saturated Br <sub>2</sub> solution at 200K                                                                                   | <i>trans</i> -Perfluorodecalin, saturated Br <sub>2</sub> solution at 200K                                                                                   |
| Obtained crystals                               | <i>trans</i> -Perfluorodecalin at 100K                                                                                                                 | <i>trans</i> -Perfluorodecalin at 200K                                                                                                                 | <i>trans</i> -Perfluorodecalin at 290K                                                                                                                  | <i>trans</i> -Perfluorodecalin at 100K (no Br <sub>2</sub> detected)                                                                                         | <i>trans</i> -Perfluorodecalin at 200K (no Br <sub>2</sub> detected by X-rays)                                                                               |
| Formula                                         | C <sub>10</sub> F <sub>18</sub>                                                                                                                        | C <sub>10</sub> F <sub>18</sub>                                                                                                                        | C <sub>10</sub> F <sub>18</sub>                                                                                                                         | C <sub>10</sub> F <sub>18</sub>                                                                                                                              | C <sub>10</sub> F <sub>18</sub>                                                                                                                              |
| <i>M<sub>s</sub></i> / g mol <sup>-1</sup>      | 462.1                                                                                                                                                  | 462.1                                                                                                                                                  | 462.1                                                                                                                                                   | 462.1                                                                                                                                                        | 462.1                                                                                                                                                        |
| <i>T</i> / K                                    | 100(2)                                                                                                                                                 | 200(2)                                                                                                                                                 | 290(2)                                                                                                                                                  | 100(2)                                                                                                                                                       | 200(2)                                                                                                                                                       |
| $\lambda$ / Å                                   | 0.71073                                                                                                                                                | 0.71073                                                                                                                                                | 0.71073                                                                                                                                                 | 0.71073                                                                                                                                                      | 0.71073                                                                                                                                                      |
| Crystal size/ mm                                | 0.400 × 0.400 × 0.600                                                                                                                                  | 0.400 × 0.400 × 0.600                                                                                                                                  | 0.400 × 0.400 × 0.600                                                                                                                                   | 0.400 × 0.400 × 0.600                                                                                                                                        | 0.400 × 0.400 × 0.600                                                                                                                                        |
| Crystal system                                  | Triclinic                                                                                                                                              | Triclinic                                                                                                                                              | Triclinic                                                                                                                                               | Triclinic                                                                                                                                                    | Triclinic                                                                                                                                                    |
| Space group                                     | <i>P</i> $\bar{1}$                                                                                                                                     | <i>P</i> $\bar{1}$                                                                                                                                     | <i>P</i> $\bar{1}$                                                                                                                                      | <i>P</i> $\bar{1}$                                                                                                                                           | <i>P</i> $\bar{1}$                                                                                                                                           |
| Unit cell parameters/ Å, °                      | <i>a</i> = 5.7433(5) Å<br><i>b</i> = 7.1269(8) Å<br><i>c</i> = 9.2269(9) Å<br>$\alpha$ = 111.701(3)°<br>$\beta$ = 89.034(4)°<br>$\gamma$ = 111.392(3)° | <i>a</i> = 5.7891(5) Å<br><i>b</i> = 7.1855(8) Å<br><i>c</i> = 9.3000(9) Å<br>$\alpha$ = 111.813(3)°<br>$\beta$ = 89.307(4)°<br>$\gamma$ = 111.525(3)° | <i>a</i> = 5.8708(7) Å<br><i>b</i> = 7.2213(7) Å<br><i>c</i> = 9.3736(12) Å<br>$\alpha$ = 111.871(3)°<br>$\beta$ = 90.014(4)°<br>$\gamma$ = 111.475(3)° | <i>a</i> = 5.7499(3) Å<br><i>b</i> = 7.1098(3) Å<br><i>c</i> = 9.2311(5) Å<br>$\alpha$ = 111.6889(11)°<br>$\beta$ = 89.1940(14)°<br>$\gamma$ = 111.4351(13)° | <i>a</i> = 5.7954(3) Å<br><i>b</i> = 7.1695(3) Å<br><i>c</i> = 9.3027(5) Å<br>$\alpha$ = 111.8030(13)°<br>$\beta$ = 89.4664(16)°<br>$\gamma$ = 111.5718(15)° |
| <i>V</i> / Å <sup>3</sup>                       | 323.68(6)                                                                                                                                              | 330.64(6)                                                                                                                                              | 338.87(7)                                                                                                                                               | 323.19(3)                                                                                                                                                    | 330.10(3)                                                                                                                                                    |
| <i>Z</i>                                        | 1                                                                                                                                                      | 1                                                                                                                                                      | 1                                                                                                                                                       | 1                                                                                                                                                            | 1                                                                                                                                                            |
| <i>D<sub>s</sub></i> / g cm <sup>-3</sup>       | 2.371                                                                                                                                                  | 2.321                                                                                                                                                  | 2.264                                                                                                                                                   | 2.374                                                                                                                                                        | 2.325                                                                                                                                                        |
| $\mu$ / mm <sup>-1</sup>                        | 0.322                                                                                                                                                  | 0.315                                                                                                                                                  | 0.307                                                                                                                                                   | 0.322                                                                                                                                                        | 0.316                                                                                                                                                        |
| <i>F</i> (000)                                  | 222                                                                                                                                                    | 222                                                                                                                                                    | 222                                                                                                                                                     | 222                                                                                                                                                          | 222                                                                                                                                                          |
| $\theta_{min}$ , $\theta_{max}$                 | 2.40°, 25.05°                                                                                                                                          | 2.38°, 25.05°                                                                                                                                          | 2.37°, 25.02°                                                                                                                                           | 2.40°, 25.04°                                                                                                                                                | 2.38°, 25.05°                                                                                                                                                |
| Index range                                     | -6 ≤ <i>h</i> ≤ 6<br>-8 ≤ <i>k</i> ≤ 7<br>-10 ≤ <i>l</i> ≤ 10                                                                                          | -6 ≤ <i>h</i> ≤ 6<br>-8 ≤ <i>k</i> ≤ 8<br>-11 ≤ <i>l</i> ≤ 11                                                                                          | -6 ≤ <i>h</i> ≤ 6<br>-8 ≤ <i>k</i> ≤ 8<br>-11 ≤ <i>l</i> ≤ 11                                                                                           | -6 ≤ <i>h</i> ≤ 6<br>-8 ≤ <i>k</i> ≤ 8<br>-10 ≤ <i>l</i> ≤ 10                                                                                                | -6 ≤ <i>h</i> ≤ 6<br>-8 ≤ <i>k</i> ≤ 8<br>-11 ≤ <i>l</i> ≤ 11                                                                                                |
| Reflections collected                           | 3140                                                                                                                                                   | 3191                                                                                                                                                   | 3241                                                                                                                                                    | 3227                                                                                                                                                         | 3296                                                                                                                                                         |
| Independent reflections                         | 1048 [ <i>R</i> <sub>int</sub> = 0.0124]                                                                                                               | 1065 [ <i>R</i> <sub>int</sub> = 0.0101]                                                                                                               | 1075 [ <i>R</i> <sub>int</sub> = 0.0191]                                                                                                                | 1052 [ <i>R</i> <sub>int</sub> = 0.0287]                                                                                                                     | 1078 [ <i>R</i> <sub>int</sub> = 0.0250]                                                                                                                     |
| Completeness for $\theta_{max}$                 | 91.5%                                                                                                                                                  | 91.3%                                                                                                                                                  | 89.8%                                                                                                                                                   | 92.2%                                                                                                                                                        | 92.5%                                                                                                                                                        |
| Absorption correction                           | semi-empirical                                                                                                                                         | semi-empirical                                                                                                                                         | semi-empirical                                                                                                                                          | semi-empirical                                                                                                                                               | semi-empirical                                                                                                                                               |
| <i>T<sub>min</sub></i> , <i>T<sub>max</sub></i> | 0.882, 0.830                                                                                                                                           | 0.884, 0.833                                                                                                                                           | 0.887, 0.837                                                                                                                                            | 0.882, 0.830                                                                                                                                                 | 0.884, 0.833                                                                                                                                                 |
| Refinement method                               | Full matrix LSQ                                                                                                                                        | Full matrix LSQ                                                                                                                                        | Full matrix LSQ                                                                                                                                         | Full matrix LSQ                                                                                                                                              | Full matrix LSQ                                                                                                                                              |
| Reflections/ restraints/ parameters             | 1048 / 0 / 127                                                                                                                                         | 1065 / 0 / 127                                                                                                                                         | 1075 / 0 / 127                                                                                                                                          | 1052 / 0 / 128                                                                                                                                               | 1078 / 0 / 128                                                                                                                                               |
| Goof on <i>F</i> <sup>2</sup>                   | 1.088                                                                                                                                                  | 1.124                                                                                                                                                  | 1.147                                                                                                                                                   | 1.077                                                                                                                                                        | 1.147                                                                                                                                                        |
| <i>R</i> [ <i>I</i> > 2 $\sigma$ ( <i>I</i> )]  | <i>R</i> 1 = 0.0259<br><i>wR</i> 2 = 0.0749<br>[1017 data; <i>I</i> > 2 $\sigma$ ( <i>I</i> )]                                                         | <i>R</i> 1 = 0.0280<br><i>wR</i> 2 = 0.0832<br>[1015 data; <i>I</i> > 2 $\sigma$ ( <i>I</i> )]                                                         | <i>R</i> 1 = 0.0500<br><i>wR</i> 2 = 0.1375<br>[947 data; <i>I</i> > 2 $\sigma$ ( <i>I</i> )]                                                           | <i>R</i> 1 = 0.0309<br><i>wR</i> 2 = 0.0864<br>[998 data; <i>I</i> > 2 $\sigma$ ( <i>I</i> )]                                                                | <i>R</i> 1 = 0.0349<br><i>wR</i> 2 = 0.0974<br>[991 data; <i>I</i> > 2 $\sigma$ ( <i>I</i> )]                                                                |
| <i>R</i> (all data)                             | <i>R</i> 1 = 0.0266<br><i>wR</i> 2 = 0.0757                                                                                                            | <i>R</i> 1 = 0.0290<br><i>wR</i> 2 = 0.0848                                                                                                            | <i>R</i> 1 = 0.0543<br><i>wR</i> 2 = 0.1465                                                                                                             | <i>R</i> 1 = 0.0321<br><i>wR</i> 2 = 0.0885                                                                                                                  | <i>R</i> 1 = 0.0370<br><i>wR</i> 2 = 0.1007                                                                                                                  |
| Extinction                                      | -                                                                                                                                                      | -                                                                                                                                                      | -                                                                                                                                                       | 0.052(10)                                                                                                                                                    | 0.076(12)                                                                                                                                                    |
| $\rho_{min}$ , $\rho_{max}$ / eÅ <sup>-3</sup>  | 0.412, -0.264                                                                                                                                          | 0.342, -0.187                                                                                                                                          | 0.275, -0.236                                                                                                                                           | 0.409, -0.333                                                                                                                                                | 0.319, -0.276                                                                                                                                                |

**Table S2.** Crystal data and refinement parameters for obtained phases.

| Name                                                     | ct_pFDec_k230K_100K                                                                                                                                   | ct_pFDec_k230K_230K                                                                                                                                     | c_pFDec_k200K_100K                                                                                       | c_pFDec_k200K_200K                                                                                       | c_pFDec_k200K_260K                                                                                    |
|----------------------------------------------------------|-------------------------------------------------------------------------------------------------------------------------------------------------------|---------------------------------------------------------------------------------------------------------------------------------------------------------|----------------------------------------------------------------------------------------------------------|----------------------------------------------------------------------------------------------------------|-------------------------------------------------------------------------------------------------------|
| <b>Compound used for crystallization</b>                 | Mixture of isomers <i>cis</i> and <i>trans</i> at 230K                                                                                                | Mixture of isomers <i>cis</i> and <i>trans</i> at 230K                                                                                                  | Isomer <i>cis</i> at 200K                                                                                | Isomer <i>cis</i> at 200K                                                                                | Isomer <i>cis</i> at 260K HT form                                                                     |
| <b>Obtained crystals</b>                                 | Disordered form of <i>trans</i> -perfluorodecalin at 100 K (no <i>cis</i> isomer detected by X-rays)                                                  | Disordered form of <i>trans</i> -perfluorodecalin at 230 K (no <i>cis</i> isomer detected by X-rays)                                                    | <i>cis</i> -Perfluorodecalin at 100 K                                                                    | <i>cis</i> -Perfluorodecalin at 200 K                                                                    | <i>cis</i> -Perfluorodecalin at 260 K                                                                 |
| <b>Formula</b>                                           | C <sub>10</sub> F <sub>18</sub>                                                                                                                       | C <sub>10</sub> F <sub>18</sub>                                                                                                                         | C <sub>10</sub> F <sub>18</sub>                                                                          | C <sub>10</sub> F <sub>18</sub>                                                                          | C <sub>10</sub> F <sub>18</sub>                                                                       |
| <b>M<sub>d</sub>/ g mol<sup>-1</sup></b>                 | 462.1                                                                                                                                                 | 462.1                                                                                                                                                   | 462.1                                                                                                    | 462.1                                                                                                    | 462.1                                                                                                 |
| <b>T/ K</b>                                              | 100(2)                                                                                                                                                | 230(2)                                                                                                                                                  | 100(2)                                                                                                   | 200(2)                                                                                                   | 260(2)                                                                                                |
| <b>λ/ Å</b>                                              | 0.71073                                                                                                                                               | 0.71073                                                                                                                                                 | 0.71073                                                                                                  | 0.71073                                                                                                  | 0.71073                                                                                               |
| <b>Crystal size/ mm</b>                                  | 0.400 × 0.400 × 0.600                                                                                                                                 | 0.400 × 0.400 × 0.600                                                                                                                                   | 0.400 × 0.400 × 0.600                                                                                    | 0.400 × 0.400 × 0.600                                                                                    | 0.400 × 0.400 × 0.600                                                                                 |
| <b>Crystal system</b>                                    | Triclinic                                                                                                                                             | Triclinic                                                                                                                                               | Monoclinic                                                                                               | Monoclinic                                                                                               | Monoclinic                                                                                            |
| <b>Space group</b>                                       | <i>P</i> $\bar{1}$                                                                                                                                    | <i>P</i> $\bar{1}$                                                                                                                                      | <i>C</i> 2/ <i>c</i>                                                                                     | <i>C</i> 2/ <i>c</i>                                                                                     | <i>I</i> 2/ <i>m</i> (probably)                                                                       |
| <b>Unit cell parameters/ Å, °</b>                        | <i>a</i> = 5.940(2) Å<br><i>b</i> = 7.257(2) Å<br><i>c</i> = 9.190(2) Å<br>$\alpha$ = 111.733(10)°<br>$\beta$ = 89.911(10)°<br>$\gamma$ = 113.546(9)° | <i>a</i> = 6.0143(18) Å<br><i>b</i> = 7.3233(19) Å<br><i>c</i> = 9.274(2) Å<br>$\alpha$ = 111.955(9)°<br>$\beta$ = 90.006(9)°<br>$\gamma$ = 113.796(8)° | <i>a</i> = 17.0062(11) Å<br><i>b</i> = 6.2091(3) Å<br><i>c</i> = 13.0007(8) Å<br>$\beta$ = 105.5020(18)° | <i>a</i> = 17.1772(10) Å<br><i>b</i> = 6.2586(2) Å<br><i>c</i> = 13.1557(7) Å<br>$\beta$ = 106.4297(15)° | <i>a</i> = 9.2499(7) Å<br><i>b</i> = 6.3171(4) Å<br><i>c</i> = 12.3565(12) Å<br>$\beta$ = 105.570(2)° |
| <b>V/ Å<sup>3</sup></b>                                  | 332.33(17)                                                                                                                                            | 341.11(16)                                                                                                                                              | 1322.85(13)                                                                                              | 1356.56(12)                                                                                              | 695.53(10)                                                                                            |
| <b>Z</b>                                                 | 1                                                                                                                                                     | 1                                                                                                                                                       | 4                                                                                                        | 4                                                                                                        | 2                                                                                                     |
| <b>D<sub>x</sub>/ g cm<sup>-3</sup></b>                  | 2.309                                                                                                                                                 | 2.249                                                                                                                                                   | 2.32                                                                                                     | 2.263                                                                                                    | 2.206                                                                                                 |
| <b>μ/ mm<sup>-1</sup></b>                                | 0.314                                                                                                                                                 | 0.305                                                                                                                                                   | 0.315                                                                                                    | 0.307                                                                                                    |                                                                                                       |
| <b>F(000)</b>                                            | 222                                                                                                                                                   | 222                                                                                                                                                     | 888                                                                                                      | 888                                                                                                      |                                                                                                       |
| <b>θ<sub>min</sub>, θ<sub>max</sub></b>                  | 2.42°, 25.05°                                                                                                                                         | 2.41°, 25.04°                                                                                                                                           | 2.49°, 25.03°                                                                                            | 2.47°, 25.05°                                                                                            |                                                                                                       |
| <b>Index range</b>                                       | -7 ≤ h ≤ 7<br>-8 ≤ k ≤ 8<br>-10 ≤ l ≤ 10                                                                                                              | -7 ≤ h ≤ 7<br>-8 ≤ k ≤ 8<br>-10 ≤ l ≤ 10                                                                                                                | -20 ≤ h ≤ 20<br>-8 ≤ k ≤ 6<br>-15 ≤ l ≤ 15                                                               | -20 ≤ h ≤ 20<br>-6 ≤ k ≤ 6<br>-15 ≤ l ≤ 15                                                               |                                                                                                       |
| <b>Reflections collected</b>                             | 3560                                                                                                                                                  | 3698                                                                                                                                                    | 5996                                                                                                     | 6356                                                                                                     |                                                                                                       |
| <b>Independent reflections</b>                           | 1048 [ <i>R</i> <sub>int</sub> = 0.0351]                                                                                                              | 1079 [ <i>R</i> <sub>int</sub> = 0.0343]                                                                                                                | 1121 [ <i>R</i> <sub>int</sub> = 0.0293]                                                                 | 1154 [ <i>R</i> <sub>int</sub> = 0.0275]                                                                 |                                                                                                       |
| <b>Completeness for θ<sub>max</sub></b>                  | 90.9%                                                                                                                                                 | 91.2%                                                                                                                                                   | 95.6%                                                                                                    | 95.8%                                                                                                    |                                                                                                       |
| <b>Absorption correction</b>                             | semi-empirical                                                                                                                                        | semi-empirical                                                                                                                                          | semi-empirical                                                                                           | semi-empirical                                                                                           |                                                                                                       |
| <b>Max. and min. transmission</b>                        | 0.885, 0.834                                                                                                                                          | 0.888, 0.838                                                                                                                                            | 0.884, 0.833                                                                                             | 0.887, 0.837                                                                                             |                                                                                                       |
| <b>Refinement method</b>                                 | Full matrix LSQ                                                                                                                                       | Full matrix LSQ                                                                                                                                         | Full matrix LSQ                                                                                          | Full matrix LSQ                                                                                          |                                                                                                       |
| <b>Reflections/ restraints/ parameters</b>               | 1048 / 133 / 255                                                                                                                                      | 1079 / 121 / 255                                                                                                                                        | 1121 / 95 / 344                                                                                          | 1154 / 155 / 344                                                                                         |                                                                                                       |
| <b>Goof on F<sup>2</sup></b>                             | 1.047                                                                                                                                                 | 1.071                                                                                                                                                   | 1.144                                                                                                    | 1.13                                                                                                     |                                                                                                       |
| <b>R [<i>I</i> &gt; 2σ(<i>I</i>)]</b>                    | R1 = 0.0872<br>wR2 = 0.2249<br>[923 data; <i>I</i> > 2σ( <i>I</i> )]                                                                                  | R1 = 0.0744<br>wR2 = 0.1951<br>[835 data; <i>I</i> > 2σ( <i>I</i> )]                                                                                    | R1 = 0.0444<br>wR2 = 0.1091<br>[922 data; <i>I</i> > 2σ( <i>I</i> )]                                     | R1 = 0.0501<br>wR2 = 0.1412<br>[848 data; <i>I</i> > 2σ( <i>I</i> )]                                     |                                                                                                       |
| <b>R (all data)</b>                                      | R1 = 0.0977<br>wR2 = 0.2401                                                                                                                           | R1 = 0.0966<br>wR2 = 0.2282                                                                                                                             | R1 = 0.0530<br>wR2 = 0.1217                                                                              | R1 = 0.0640<br>wR2 = 0.1741                                                                              |                                                                                                       |
| <b>Extinction</b>                                        | -                                                                                                                                                     | -                                                                                                                                                       | -                                                                                                        | 0.014(3)                                                                                                 |                                                                                                       |
| <b>ρ<sub>min</sub>, ρ<sub>max</sub>/ eÅ<sup>-3</sup></b> | 0.373, -0.324                                                                                                                                         | 0.243, -0.212                                                                                                                                           | 0.138, -0.166                                                                                            | 0.135, -0.165                                                                                            |                                                                                                       |

**Table S3.** Crystal data and refinement parameters for obtained phases.

| Name                                                   | t_Dec_k200K_100K                                                                                           | t_Dec_k200K_200K                                                                                           | c_Dec_k180K_100K_cd_aP                                                                                                                                     | c_Dec_k180K_220K_hu_ml                                                                                       |
|--------------------------------------------------------|------------------------------------------------------------------------------------------------------------|------------------------------------------------------------------------------------------------------------|------------------------------------------------------------------------------------------------------------------------------------------------------------|--------------------------------------------------------------------------------------------------------------|
| Compound used for crystallization                      | Isomer <i>trans</i> at 200K                                                                                | Isomer <i>trans</i> at 200K                                                                                | Isomer <i>cis</i> at 180K                                                                                                                                  | Isomer <i>cis</i> at 180K                                                                                    |
| Obtained crystals                                      | <i>trans</i> -Decalin at 100K                                                                              | <i>trans</i> -Decalin at 200K                                                                              | <i>cis</i> -Decalin at 100K<br>LT phase - triclinic                                                                                                        | <i>cis</i> -Decalin at 220K<br>HT phase – monoclinic                                                         |
| Formula                                                | C <sub>10</sub> H <sub>18</sub>                                                                            | C <sub>10</sub> H <sub>18</sub>                                                                            | C <sub>10</sub> H <sub>18</sub>                                                                                                                            | C <sub>10</sub> H <sub>18</sub>                                                                              |
| M <sub>r</sub> / g mol <sup>-1</sup>                   | 138.24                                                                                                     | 138.24                                                                                                     | 138.24                                                                                                                                                     | 138.24                                                                                                       |
| T/ K                                                   | 100(2)                                                                                                     | 200(2)                                                                                                     | 100(2)                                                                                                                                                     | 220(2)                                                                                                       |
| λ/ Å                                                   | 0.71073                                                                                                    | 0.71073                                                                                                    | 0.71073                                                                                                                                                    | 0.71073                                                                                                      |
| Crystal size/ mm                                       | 0.400 × 0.400 × 0.600                                                                                      | 0.400 × 0.400 × 0.600                                                                                      | 0.400 × 0.400 × 0.600                                                                                                                                      | 0.400 × 0.400 × 0.600                                                                                        |
| Crystal system                                         | Monoclinic                                                                                                 | Monoclinic                                                                                                 | Triclinic                                                                                                                                                  | Monoclinic                                                                                                   |
| Space group                                            | <i>P</i> 2 <sub>1</sub> / <i>n</i>                                                                         | <i>P</i> 2 <sub>1</sub> / <i>n</i>                                                                         | <i>P</i> $\bar{1}$                                                                                                                                         | <i>I</i> 2/ <i>a</i>                                                                                         |
| Unit cell parameters/ Å, °                             | <i>a</i> = 5.2670(2) Å<br><i>b</i> = 10.4832(4) Å<br><i>c</i> = 7.8148(2) Å<br><br><i>β</i> = 90.8405(13)° | <i>a</i> = 5.3191(2) Å<br><i>b</i> = 10.5640(4) Å<br><i>c</i> = 7.8580(2) Å<br><br><i>β</i> = 90.7843(14)° | <i>a</i> = 8.2602(9) Å<br><i>b</i> = 10.5243(9) Å<br><i>c</i> = 11.9532(12) Å<br><i>α</i> = 113.547(3)°<br><i>β</i> = 90.225(3)°<br><i>γ</i> = 112.687(3)° | <i>a</i> = 11.9659(5) Å<br><i>b</i> = 8.2828(4) Å<br><i>c</i> = 18.4270(9) Å<br><br><i>β</i> = 102.0193(12)° |
| V/ Å <sup>3</sup>                                      | 431.45(3)                                                                                                  | 441.51(3)                                                                                                  | 863.42(15)                                                                                                                                                 | 1786.28(14)                                                                                                  |
| Z                                                      | 2                                                                                                          | 2                                                                                                          | 4                                                                                                                                                          | 8                                                                                                            |
| D <sub>x</sub> / g cm <sup>-3</sup>                    | 1.064                                                                                                      | 1.04                                                                                                       | 1.063                                                                                                                                                      | 1.028                                                                                                        |
| μ/ mm <sup>-1</sup>                                    | 0.059                                                                                                      | 0.057 <sup>1</sup>                                                                                         | 0.058                                                                                                                                                      | 0.057                                                                                                        |
| F(000)                                                 | 156                                                                                                        | 156                                                                                                        | 312                                                                                                                                                        | 624                                                                                                          |
| θ <sub>min</sub> , θ <sub>max</sub>                    | 3.25°, 25.03°                                                                                              | 3.23°, 25.02°                                                                                              | 2.27°, 25.05°                                                                                                                                              | 2.26°, 25.05°                                                                                                |
| Index range                                            | -6 ≤ <i>h</i> ≤ 6<br>-12 ≤ <i>k</i> ≤ 12<br>-9 ≤ <i>l</i> ≤ 9                                              | -6 ≤ <i>h</i> ≤ 6<br>-12 ≤ <i>k</i> ≤ 12<br>-9 ≤ <i>l</i> ≤ 9                                              | -9 ≤ <i>h</i> ≤ 9<br>-11 ≤ <i>k</i> ≤ 11<br>-14 ≤ <i>l</i> ≤ 14                                                                                            | -14 ≤ <i>h</i> ≤ 14<br>-9 ≤ <i>k</i> ≤ 9<br>-21 ≤ <i>l</i> ≤ 21                                              |
| Reflections collected                                  | 5041                                                                                                       | 5127                                                                                                       | 9821                                                                                                                                                       | 10524                                                                                                        |
| Independent reflections                                | 717 [ <i>R</i> <sub>int</sub> = 0.0127]                                                                    | 727 [ <i>R</i> <sub>int</sub> = 0.0169]                                                                    | 2761 [ <i>R</i> <sub>int</sub> = 0.0264]                                                                                                                   | 1563 [ <i>R</i> <sub>int</sub> = 0.0255]                                                                     |
| Completeness for θ <sub>max</sub>                      | 93.1%                                                                                                      | 93.0%                                                                                                      | 95.9%                                                                                                                                                      | 98.7%                                                                                                        |
| Absorption correction                                  | semi-empirical                                                                                             | semi-empirical                                                                                             | semi-empirical                                                                                                                                             | semi-empirical                                                                                               |
| T <sub>min</sub> , T <sub>max</sub>                    | 0.977, 0.966                                                                                               | 0.977, 0.966                                                                                               | 0.977, 0.966                                                                                                                                               | 0.978, 0.967                                                                                                 |
| Refinement method                                      | Full matrix LSQ                                                                                            | Full matrix LSQ                                                                                            | Full matrix LSQ                                                                                                                                            | Full matrix LSQ                                                                                              |
| Reflections/ restraints/ parameters                    | 717 / 0 / 47                                                                                               | 727 / 0 / 47                                                                                               | 2761 / 0 / 182                                                                                                                                             | 1563 / 25 / 133                                                                                              |
| Goof on F <sup>2</sup>                                 | 1.1                                                                                                        | 1.146                                                                                                      | 1.053                                                                                                                                                      | 1.024                                                                                                        |
| R [ <i>I</i> > 2σ( <i>I</i> )]                         | <i>R</i> 1 = 0.0341<br><i>wR</i> 2 = 0.0815<br>[681 data; <i>I</i> > 2σ( <i>I</i> )]                       | <i>R</i> 1 = 0.0390<br><i>wR</i> 2 = 0.0940<br>[671 data; <i>I</i> > 2σ( <i>I</i> )]                       | <i>R</i> 1 = 0.0423<br><i>wR</i> 2 = 0.0922<br>[2463 data; <i>I</i> > 2σ( <i>I</i> )]                                                                      | <i>R</i> 1 = 0.0477<br><i>wR</i> 2 = 0.1119<br>[1211 data; <i>I</i> > 2σ( <i>I</i> )]                        |
| R (all data)                                           | <i>R</i> 1 = 0.0356<br><i>wR</i> 2 = 0.0828                                                                | <i>R</i> 1 = 0.0413<br><i>wR</i> 2 = 0.0963                                                                | <i>R</i> 1 = 0.0503<br><i>wR</i> 2 = 0.0990                                                                                                                | <i>R</i> 1 = 0.0628<br><i>wR</i> 2 = 0.1258                                                                  |
| Extinction                                             | 0.036(11)                                                                                                  | 0.21(2)                                                                                                    | -                                                                                                                                                          | 0.0027(9)                                                                                                    |
| ρ <sub>min</sub> , ρ <sub>max</sub> / eÅ <sup>-3</sup> | 0.224, -0.137                                                                                              | 0.196, -0.127                                                                                              | 0.186, -0.169                                                                                                                                              | 0.106, -0.105                                                                                                |

**Table S4.** Crystal data and refinement parameters for cis-dekalin single crystal refined in two space groups at various temperatures.

| Name                                                 | c_Dec_k180K_100K_cd_aP                                                                                                                                    | c_Dec_k180K_100K_cd_ml                                                                                 | c_Dec_k180K_110K_cd_aP                                                                                                                                    | c_Dec_k180K_110K_cd_ml                                                                                 | c_Dec_k180K_110K_hu_aP                                                                                                                                    | c_Dec_k180K_110K_hu_ml                                                                                 | c_Dec_k180K_120K_cd_aP                                                                                                                                    | c_Dec_k180K_120K_cd_ml                                                                                | c_Dec_k180K_120K_hu_aP                                                                                                                                   | c_Dec_K180_120K_hu_ml                                                                                 | c_Dec_k180K_130K_cd_aP                                                                                                                                       |                                                                 |
|------------------------------------------------------|-----------------------------------------------------------------------------------------------------------------------------------------------------------|--------------------------------------------------------------------------------------------------------|-----------------------------------------------------------------------------------------------------------------------------------------------------------|--------------------------------------------------------------------------------------------------------|-----------------------------------------------------------------------------------------------------------------------------------------------------------|--------------------------------------------------------------------------------------------------------|-----------------------------------------------------------------------------------------------------------------------------------------------------------|-------------------------------------------------------------------------------------------------------|----------------------------------------------------------------------------------------------------------------------------------------------------------|-------------------------------------------------------------------------------------------------------|--------------------------------------------------------------------------------------------------------------------------------------------------------------|-----------------------------------------------------------------|
| Compound used for crystallization                    | Isomer <i>cis</i> at 180K                                                                                                                                 | Isomer <i>cis</i> at 180K                                                                              | Isomer <i>cis</i> at 180K                                                                                                                                 | Isomer <i>cis</i> at 180K                                                                              | Isomer <i>cis</i> at 180K                                                                                                                                 | Isomer <i>cis</i> at 180K                                                                              | Isomer <i>cis</i> at 180K                                                                                                                                 | Isomer <i>cis</i> at 180K                                                                             | Isomer <i>cis</i> at 180K                                                                                                                                | Isomer <i>cis</i> at 180K                                                                             | Isomer <i>cis</i> at 180K                                                                                                                                    |                                                                 |
| Formula                                              | C <sub>10</sub> H <sub>18</sub>                                                                                                                           | C <sub>10</sub> H <sub>18</sub>                                                                        | C <sub>10</sub> H <sub>18</sub>                                                                                                                           | C <sub>10</sub> H <sub>18</sub>                                                                        | C <sub>10</sub> H <sub>18</sub>                                                                                                                           | C <sub>10</sub> H <sub>18</sub>                                                                        | C <sub>10</sub> H <sub>18</sub>                                                                                                                           | C <sub>10</sub> H <sub>18</sub>                                                                       | C <sub>10</sub> H <sub>18</sub>                                                                                                                          | C <sub>10</sub> H <sub>18</sub>                                                                       | C <sub>10</sub> H <sub>18</sub>                                                                                                                              |                                                                 |
| M <sub>r</sub> / g mol <sup>-1</sup>                 | 138.24                                                                                                                                                    | 138.24                                                                                                 | 138.24                                                                                                                                                    | 138.24                                                                                                 | 138.24                                                                                                                                                    | 138.24                                                                                                 | 138.24                                                                                                                                                    | 138.24                                                                                                | 138.24                                                                                                                                                   | 138.24                                                                                                | 138.24                                                                                                                                                       |                                                                 |
| T/ K                                                 | 100(2)                                                                                                                                                    | 100(2)                                                                                                 | 110(2)                                                                                                                                                    | 110(2)                                                                                                 | 110(2)                                                                                                                                                    | 110(2)                                                                                                 | 120(2)                                                                                                                                                    | 120(2)                                                                                                | 120(2)                                                                                                                                                   | 120(2)                                                                                                | 130(2)                                                                                                                                                       |                                                                 |
| λ/ Å                                                 | 0.71073                                                                                                                                                   | 0.71073                                                                                                | 0.71073                                                                                                                                                   | 0.71073                                                                                                | 0.71073                                                                                                                                                   | 0.71073                                                                                                | 0.71073                                                                                                                                                   | 0.71073                                                                                               | 0.71073                                                                                                                                                  | 0.71073                                                                                               | 0.71073                                                                                                                                                      |                                                                 |
| Crystal size/ mm                                     | 0.400×0.400×0.600                                                                                                                                         | 0.400×0.400×0.600                                                                                      | 0.400×0.400×0.600                                                                                                                                         | 0.400×0.400×0.600                                                                                      | 0.400×0.400×0.600                                                                                                                                         | 0.400×0.400×0.600                                                                                      | 0.400×0.400×0.600                                                                                                                                         | 0.400×0.400×0.600                                                                                     | 0.400×0.400×0.600                                                                                                                                        | 0.400×0.400×0.600                                                                                     | 0.400×0.400×0.600                                                                                                                                            |                                                                 |
| Crystal system                                       | Triclinic                                                                                                                                                 | monoclinic                                                                                             | triclinic                                                                                                                                                 | monoclinic                                                                                             | triclinic                                                                                                                                                 | monoclinic                                                                                             | triclinic                                                                                                                                                 | monoclinic                                                                                            | triclinic                                                                                                                                                | monoclinic                                                                                            | triclinic                                                                                                                                                    |                                                                 |
| Space group                                          | <i>P</i> $\bar{1}$                                                                                                                                        | <i>I</i> 2/a                                                                                           | <i>P</i> $\bar{1}$                                                                                                                                        | <i>I</i> 2/a                                                                                           | <i>P</i> $\bar{1}$                                                                                                                                        | <i>I</i> 2/a                                                                                           | <i>P</i> $\bar{1}$                                                                                                                                        | <i>I</i> 2/a                                                                                          | <i>P</i> $\bar{1}$                                                                                                                                       | <i>I</i> 2/a                                                                                          | <i>P</i> $\bar{1}$                                                                                                                                           |                                                                 |
| Unit cell parameters/ Å, °                           | <i>a</i> = 8.2602(9) Å<br><i>b</i> = 10.5243(9) Å<br><i>c</i> = 11.9532(12) Å<br>$\alpha$ = 113.547(3)°<br>$\beta$ = 90.225(3)°<br>$\gamma$ = 112.687(3)° | <i>a</i> = 11.9250(15) Å<br><i>b</i> = 8.2439(11) Å<br><i>c</i> = 17.812(3) Å<br>$\beta$ = 101.364(4)° | <i>a</i> = 8.2634(9) Å<br><i>b</i> = 10.5357(9) Å<br><i>c</i> = 11.9616(12) Å<br>$\alpha$ = 113.547(3)°<br>$\beta$ = 90.218(3)°<br>$\gamma$ = 112.694(3)° | <i>a</i> = 11.9376(14) Å<br><i>b</i> = 8.2488(10) Å<br><i>c</i> = 17.833(2) Å<br>$\beta$ = 101.352(3)° | <i>a</i> = 8.2635(9) Å<br><i>b</i> = 10.5367(9) Å<br><i>c</i> = 11.9622(12) Å<br>$\alpha$ = 113.553(3)°<br>$\beta$ = 90.215(3)°<br>$\gamma$ = 112.692(3)° | <i>a</i> = 11.9334(14) Å<br><i>b</i> = 8.2466(10) Å<br><i>c</i> = 17.828(2) Å<br>$\beta$ = 101.350(3)° | <i>a</i> = 8.2665(7) Å<br><i>b</i> = 10.5488(7) Å<br><i>c</i> = 11.9705(10) Å<br>$\alpha$ = 113.550(2)°<br>$\beta$ = 90.196(3)°<br>$\gamma$ = 112.709(2)° | <i>a</i> = 11.9467(12) Å<br><i>b</i> = 8.2518(9) Å<br><i>c</i> = 17.853(2) Å<br>$\beta$ = 101.341(3)° | <i>a</i> = 8.2665(7) Å<br><i>b</i> = 10.5475(7) Å<br><i>c</i> = 11.9704(9) Å<br>$\alpha$ = 113.554(2)°<br>$\beta$ = 90.201(3)°<br>$\gamma$ = 112.704(2)° | <i>a</i> = 11.9439(13) Å<br><i>b</i> = 8.2503(9) Å<br><i>c</i> = 17.847(2) Å<br>$\beta$ = 101.343(3)° | <i>a</i> = 8.2712(6) Å<br><i>b</i> = 10.5654(5) Å<br><i>c</i> = 11.9798(8) Å<br>$\alpha$ = 113.5395(18)°<br>$\beta$ = 90.160(2)°<br>$\gamma$ = 112.7466(18)° |                                                                 |
| V/ Å <sup>3</sup>                                    | 863.42(15)                                                                                                                                                | 1716.7(4)                                                                                              | 865.27(15)                                                                                                                                                | 1721.7(4)                                                                                              | 865.38(15)                                                                                                                                                | 1720.1(4)                                                                                              | 867.25(12)                                                                                                                                                | 1725.6(3)                                                                                             | 867.12(12)                                                                                                                                               | 1724.3(3)                                                                                             | 869.69(10)                                                                                                                                                   |                                                                 |
| Z                                                    | 4                                                                                                                                                         | 8                                                                                                      | 4                                                                                                                                                         | 8                                                                                                      | 4                                                                                                                                                         | 8                                                                                                      | 4                                                                                                                                                         | 8                                                                                                     | 4                                                                                                                                                        | 8                                                                                                     | 4                                                                                                                                                            |                                                                 |
| D <sub>x</sub> / g cm <sup>-3</sup>                  | 1.063                                                                                                                                                     | 1.070                                                                                                  | 1.061                                                                                                                                                     | 1.067                                                                                                  | 1.061                                                                                                                                                     | 1.068                                                                                                  | 1.059                                                                                                                                                     | 1.064                                                                                                 | 1.059                                                                                                                                                    | 1.065                                                                                                 | 1.056                                                                                                                                                        |                                                                 |
| μ/ mm <sup>-1</sup>                                  | 0.058                                                                                                                                                     | 0.059                                                                                                  | 0.058                                                                                                                                                     | 0.059                                                                                                  | 0.058                                                                                                                                                     | 0.059                                                                                                  | 0.058                                                                                                                                                     | 0.059                                                                                                 | 0.058                                                                                                                                                    | 0.059                                                                                                 | 0.058                                                                                                                                                        |                                                                 |
| F(000)                                               | 312                                                                                                                                                       | 624                                                                                                    | 312                                                                                                                                                       | 624                                                                                                    | 312                                                                                                                                                       | 624                                                                                                    | 312                                                                                                                                                       | 624                                                                                                   | 312                                                                                                                                                      | 624                                                                                                   | 312                                                                                                                                                          |                                                                 |
| θ <sub>min</sub> θ <sub>max</sub>                    | 2.27°, 25.05°                                                                                                                                             | 2.33°, 25.04°                                                                                          | 2.27°, 25.05°                                                                                                                                             | 2.33°, 25.05°                                                                                          | 2.27°, 25.05°                                                                                                                                             | 2.33°, 25.04°                                                                                          | 2.27°, 25.05°                                                                                                                                             | 2.33°, 25.04°                                                                                         | 2.27°, 25.04°                                                                                                                                            | 2.33°, 25.05°                                                                                         | 2.32°, 25.05°                                                                                                                                                |                                                                 |
| Index range                                          | -9 ≤ <i>h</i> ≤ 9<br>-11 ≤ <i>k</i> ≤ 11<br>-14 ≤ <i>l</i> ≤ 14                                                                                           | -14 ≤ <i>h</i> ≤ 14<br>-9 ≤ <i>k</i> ≤ 9<br>-21 ≤ <i>l</i> ≤ 21                                        | -9 ≤ <i>h</i> ≤ 9<br>-11 ≤ <i>k</i> ≤ 11<br>-14 ≤ <i>l</i> ≤ 14                                                                                           | -14 ≤ <i>h</i> ≤ 14<br>-9 ≤ <i>k</i> ≤ 9<br>-21 ≤ <i>l</i> ≤ 21                                        | -9 ≤ <i>h</i> ≤ 9<br>-11 ≤ <i>k</i> ≤ 11<br>-14 ≤ <i>l</i> ≤ 14                                                                                           | -14 ≤ <i>h</i> ≤ 14<br>-9 ≤ <i>k</i> ≤ 9<br>-21 ≤ <i>l</i> ≤ 21                                        | -9 ≤ <i>h</i> ≤ 9<br>-11 ≤ <i>k</i> ≤ 11<br>-14 ≤ <i>l</i> ≤ 14                                                                                           | -9 ≤ <i>h</i> ≤ 9<br>-11 ≤ <i>k</i> ≤ 11<br>-14 ≤ <i>l</i> ≤ 14                                       | -14 ≤ <i>h</i> ≤ 14<br>-9 ≤ <i>k</i> ≤ 9<br>-21 ≤ <i>l</i> ≤ 21                                                                                          | -9 ≤ <i>h</i> ≤ 9<br>-11 ≤ <i>k</i> ≤ 11<br>-14 ≤ <i>l</i> ≤ 14                                       | -14 ≤ <i>h</i> ≤ 14<br>-9 ≤ <i>k</i> ≤ 9<br>-21 ≤ <i>l</i> ≤ 21                                                                                              | -9 ≤ <i>h</i> ≤ 9<br>-11 ≤ <i>k</i> ≤ 11<br>-14 ≤ <i>l</i> ≤ 14 |
| Reflections collected                                | 9821                                                                                                                                                      | 9651                                                                                                   | 10205                                                                                                                                                     | 9764                                                                                                   | 10046                                                                                                                                                     | 9786                                                                                                   | 10299                                                                                                                                                     | 9835                                                                                                  | 10269                                                                                                                                                    | 9877                                                                                                  | 10485                                                                                                                                                        |                                                                 |
| Independent reflections                              | 2761 [ <i>R</i> <sub>int</sub> = 0.0264]                                                                                                                  | 1490 [ <i>R</i> <sub>int</sub> = 0.0578]                                                               | 2818 [ <i>R</i> <sub>int</sub> = 0.0248]                                                                                                                  | 1500 [ <i>R</i> <sub>int</sub> = 0.0533]                                                               | 2787 [ <i>R</i> <sub>int</sub> = 0.0255]                                                                                                                  | 1499 [ <i>R</i> <sub>int</sub> = 0.0553]                                                               | 2831 [ <i>R</i> <sub>int</sub> = 0.0222]                                                                                                                  | 1499 [ <i>R</i> <sub>int</sub> = 0.0474]                                                              | 2823 [ <i>R</i> <sub>int</sub> = 0.0225]                                                                                                                 | 1506 [ <i>R</i> <sub>int</sub> = 0.0497]                                                              | 2849 [ <i>R</i> <sub>int</sub> = 0.0204]                                                                                                                     |                                                                 |
| Completeness for θ <sub>max</sub>                    | 95.9%                                                                                                                                                     | 97.7%                                                                                                  | 96.8%                                                                                                                                                     | 98.0%                                                                                                  | 96.2%                                                                                                                                                     | 98.1%                                                                                                  | 97.2%                                                                                                                                                     | 97.8%                                                                                                 | 97.0%                                                                                                                                                    | 98.3%                                                                                                 | 97.5%                                                                                                                                                        |                                                                 |
| Absorption correction                                | multi-scan                                                                                                                                                | multi-scan                                                                                             | multi-scan                                                                                                                                                | multi-scan                                                                                             | multi-scan                                                                                                                                                | multi-scan                                                                                             | multi-scan                                                                                                                                                | multi-scan                                                                                            | multi-scan                                                                                                                                               | multi-scan                                                                                            | multi-scan                                                                                                                                                   |                                                                 |
| T <sub>min</sub> T <sub>max</sub>                    | 0.977, 0.966                                                                                                                                              | 0.977, 0.966                                                                                           | 0.977, 0.966                                                                                                                                              | 0.977, 0.966                                                                                           | 0.977, 0.966                                                                                                                                              | 0.977, 0.966                                                                                           | 0.977, 0.966                                                                                                                                              | 0.977, 0.966                                                                                          | 0.977, 0.966                                                                                                                                             | 0.977, 0.966                                                                                          | 0.977, 0.966                                                                                                                                                 |                                                                 |
| Refinement method                                    | Full matrix LSQ                                                                                                                                           | Full matrix LSQ                                                                                        | Full matrix LSQ                                                                                                                                           | Full matrix LSQ                                                                                        | Full matrix LSQ                                                                                                                                           | Full matrix LSQ                                                                                        | Full matrix LSQ                                                                                                                                           | Full matrix LSQ                                                                                       | Full matrix LSQ                                                                                                                                          | Full matrix LSQ                                                                                       | Full matrix LSQ                                                                                                                                              |                                                                 |
| Reflections/ restraints/ parameters                  | 2761 / 0 / 182                                                                                                                                            | 1490 / 0 / 91                                                                                          | 2818 / 0 / 182                                                                                                                                            | 1500 / 0 / 91                                                                                          | 2787 / 0 / 182                                                                                                                                            | 1499 / 0 / 91                                                                                          | 2831 / 0 / 182                                                                                                                                            | 1499 / 0 / 91                                                                                         | 2823 / 0 / 182                                                                                                                                           | 1506 / 0 / 91                                                                                         | 2849 / 0 / 182                                                                                                                                               |                                                                 |
| Goof on F <sup>2</sup>                               | 1.053                                                                                                                                                     | 1.205                                                                                                  | 1.056                                                                                                                                                     | 1.194                                                                                                  | 1.061                                                                                                                                                     | 1.198                                                                                                  | 1.072                                                                                                                                                     | 1.190                                                                                                 | 1.079                                                                                                                                                    | 1.185                                                                                                 | 1.059                                                                                                                                                        |                                                                 |
| R [ <i>I</i> > 2σ( <i>I</i> )]                       | <i>R</i> 1 = 0.0423<br><i>wR</i> 2 = 0.0922<br>[2463 data; <i>I</i> > 2σ( <i>I</i> )]                                                                     | <i>R</i> 1 = 0.0886<br><i>wR</i> 2 = 0.1674<br>[1368 data; <i>I</i> > 2σ( <i>I</i> )]                  | <i>R</i> 1 = 0.0411<br><i>wR</i> 2 = 0.0953<br>[2514 data; <i>I</i> > 2σ( <i>I</i> )]                                                                     | <i>R</i> 1 = 0.0806<br><i>wR</i> 2 = 0.1539<br>[1384 data; <i>I</i> > 2σ( <i>I</i> )]                  | <i>R</i> 1 = 0.0423<br><i>wR</i> 2 = 0.0965<br>[2486 data; <i>I</i> > 2σ( <i>I</i> )]                                                                     | <i>R</i> 1 = 0.0816<br><i>wR</i> 2 = 0.1590<br>[1381 data; <i>I</i> > 2σ( <i>I</i> )]                  | <i>R</i> 1 = 0.0427<br><i>wR</i> 2 = 0.0950<br>[2546 data; <i>I</i> > 2σ( <i>I</i> )]                                                                     | <i>R</i> 1 = 0.0738<br><i>wR</i> 2 = 0.1425<br>[1380 data; <i>I</i> > 2σ( <i>I</i> )]                 | <i>R</i> 1 = 0.0422<br><i>wR</i> 2 = 0.0946<br>[2514 data; <i>I</i> > 2σ( <i>I</i> )]                                                                    | <i>R</i> 1 = 0.0739<br><i>wR</i> 2 = 0.1461<br>[1388 data; <i>I</i> > 2σ( <i>I</i> )]                 | <i>R</i> 1 = 0.0406<br><i>wR</i> 2 = 0.0938<br>[2524 data; <i>I</i> > 2σ( <i>I</i> )]                                                                        |                                                                 |
| R (all data)                                         | <i>R</i> 1 = 0.0503<br><i>wR</i> 2 = 0.0990                                                                                                               | <i>R</i> 1 = 0.0937<br><i>wR</i> 2 = 0.1698                                                            | <i>R</i> 1 = 0.0486<br><i>wR</i> 2 = 0.1028                                                                                                               | <i>R</i> 1 = 0.0850<br><i>wR</i> 2 = 0.1561                                                            | <i>R</i> 1 = 0.0496<br><i>wR</i> 2 = 0.1025                                                                                                               | <i>R</i> 1 = 0.0856<br><i>wR</i> 2 = 0.1609                                                            | <i>R</i> 1 = 0.0496<br><i>wR</i> 2 = 0.1009                                                                                                               | <i>R</i> 1 = 0.0782<br><i>wR</i> 2 = 0.1448                                                           | <i>R</i> 1 = 0.0500<br><i>wR</i> 2 = 0.1021                                                                                                              | <i>R</i> 1 = 0.0784<br><i>wR</i> 2 = 0.1488                                                           | <i>R</i> 1 = 0.0480<br><i>wR</i> 2 = 0.1003                                                                                                                  |                                                                 |
| Extinction                                           | -                                                                                                                                                         | -                                                                                                      | -                                                                                                                                                         | -                                                                                                      | -                                                                                                                                                         | -                                                                                                      | -                                                                                                                                                         | -                                                                                                     | -                                                                                                                                                        | -                                                                                                     | -                                                                                                                                                            |                                                                 |
| ρ <sub>min</sub> ρ <sub>max</sub> / eÅ <sup>-3</sup> | 0.186, -0.169                                                                                                                                             | 0.282, -0.241                                                                                          | 0.203, -0.155                                                                                                                                             | 0.239, -0.192 eÅ <sup>-3</sup>                                                                         | 0.182, -0.175                                                                                                                                             | 0.227, -0.203                                                                                          | 0.178, -0.195                                                                                                                                             | 0.211, -0.171                                                                                         | 0.176, -0.150                                                                                                                                            | 0.224, -0.176                                                                                         | 0.187, -0.151                                                                                                                                                |                                                                 |

 cd = cooling down, hu = heating up. Columns coloured in orange stand for data present in the **Table S3** in ESI.

**Table S4.** Crystal data and refinement parameters for cis-dekalin single crystal refined in two space groups at various temperatures. Continuation.

| Name                                           | c_Dec_k180K_130K_cd_ml                                                                                  | c_Dec_k180K_130K_hu_aP                                                                                                                                    | c_Dec_k180K_130K_hu_ml                                                                                  | c_Dec_k180K_140K_cd_aP                                                                                                                                         | c_Dec_k180K_140K_cd_ml                                                                                   | c_Dec_k180K_140K_hu_aP                                                                                                                                         | c_Dec_k180K_140K_hu_ml                                                                                   | c_Dec_k180K_150K_cd_aP                                                                                                                                         | c_Dec_k180K_150K_cd_ml                                                                                   | c_Dec_k180K_150K_hu_aP                                                                                                                                      | c_Dec_k180K_150K_hu_ml                                                                                  |                                                                 |
|------------------------------------------------|---------------------------------------------------------------------------------------------------------|-----------------------------------------------------------------------------------------------------------------------------------------------------------|---------------------------------------------------------------------------------------------------------|----------------------------------------------------------------------------------------------------------------------------------------------------------------|----------------------------------------------------------------------------------------------------------|----------------------------------------------------------------------------------------------------------------------------------------------------------------|----------------------------------------------------------------------------------------------------------|----------------------------------------------------------------------------------------------------------------------------------------------------------------|----------------------------------------------------------------------------------------------------------|-------------------------------------------------------------------------------------------------------------------------------------------------------------|---------------------------------------------------------------------------------------------------------|-----------------------------------------------------------------|
| Compound used for crystallization              | Isomer <i>cis</i> at 180K                                                                               | Isomer <i>cis</i> at 180K                                                                                                                                 | Isomer <i>cis</i> at 180K                                                                               | Isomer <i>cis</i> at 180K                                                                                                                                      | Isomer <i>cis</i> at 180K                                                                                | Isomer <i>cis</i> at 180K                                                                                                                                      | Isomer <i>cis</i> at 180K                                                                                | Isomer <i>cis</i> at 180K                                                                                                                                      | Isomer <i>cis</i> at 180K                                                                                | Isomer <i>cis</i> at 180K                                                                                                                                   | Isomer <i>cis</i> at 180K                                                                               |                                                                 |
| Formula                                        | C <sub>10</sub> H <sub>18</sub>                                                                         | C <sub>10</sub> H <sub>18</sub>                                                                                                                           | C <sub>10</sub> H <sub>18</sub>                                                                         | C <sub>10</sub> H <sub>18</sub>                                                                                                                                | C <sub>10</sub> H <sub>18</sub>                                                                          | C <sub>10</sub> H <sub>18</sub>                                                                                                                                | C <sub>10</sub> H <sub>18</sub>                                                                          | C <sub>10</sub> H <sub>18</sub>                                                                                                                                | C <sub>10</sub> H <sub>18</sub>                                                                          | C <sub>10</sub> H <sub>18</sub>                                                                                                                             | C <sub>10</sub> H <sub>18</sub>                                                                         |                                                                 |
| <i>M<sub>r</sub></i> / g mol <sup>-1</sup>     | 138.24                                                                                                  | 138.24                                                                                                                                                    | 138.24                                                                                                  | 138.24                                                                                                                                                         | 138.24                                                                                                   | 138.24                                                                                                                                                         | 138.24                                                                                                   | 138.24                                                                                                                                                         | 138.24                                                                                                   | 138.24                                                                                                                                                      | 138.24                                                                                                  |                                                                 |
| <i>T</i> / K                                   | 132(2)                                                                                                  | 130(2)                                                                                                                                                    | 130(2)                                                                                                  | 140(2)                                                                                                                                                         | 140(2)                                                                                                   | 140(2)                                                                                                                                                         | 140(2)                                                                                                   | 150(2)                                                                                                                                                         | 150(2)                                                                                                   | 150(2)                                                                                                                                                      | 150(2)                                                                                                  |                                                                 |
| $\lambda$ / Å                                  | 0.71073                                                                                                 | 0.71073                                                                                                                                                   | 0.71073                                                                                                 | 0.71073                                                                                                                                                        | 0.71073                                                                                                  | 0.71073                                                                                                                                                        | 0.71073                                                                                                  | 0.71073                                                                                                                                                        | 0.71073                                                                                                  | 0.71073                                                                                                                                                     | 0.71073                                                                                                 |                                                                 |
| Crystal size/ mm                               | 0.400×0.400×0.600                                                                                       | 0.400×0.400×0.600                                                                                                                                         | 0.400×0.400×0.600                                                                                       | 0.400×0.400×0.600                                                                                                                                              | 0.400×0.400×0.600                                                                                        | 0.400×0.400×0.600                                                                                                                                              | 0.400×0.400×0.600                                                                                        | 0.400×0.400×0.600                                                                                                                                              | 0.400×0.400×0.600                                                                                        | 0.400×0.400×0.600                                                                                                                                           | 0.400×0.400×0.600                                                                                       |                                                                 |
| Crystal system                                 | monoclinic                                                                                              | triclinic                                                                                                                                                 | monoclinic                                                                                              | triclinic                                                                                                                                                      | monoclinic                                                                                               | triclinic                                                                                                                                                      | monoclinic                                                                                               | triclinic                                                                                                                                                      | monoclinic                                                                                               | triclinic                                                                                                                                                   | monoclinic                                                                                              |                                                                 |
| Space group                                    | <i>I</i> 2/ <i>a</i>                                                                                    | $\bar{P}$ 1                                                                                                                                               | <i>I</i> 2/ <i>a</i>                                                                                    | $\bar{P}$ 1                                                                                                                                                    | <i>I</i> 2/ <i>a</i>                                                                                     | $\bar{P}$ 1                                                                                                                                                    | <i>I</i> 2/ <i>a</i>                                                                                     | $\bar{P}$ 1                                                                                                                                                    | <i>I</i> 2/ <i>a</i>                                                                                     | $\bar{P}$ 1                                                                                                                                                 | <i>I</i> 2/ <i>a</i>                                                                                    |                                                                 |
| Unit cell parameters/ Å, °                     | <i>a</i> = 11.9609(10) Å<br><i>b</i> = 8.2593(7) Å<br><i>c</i> = 17.8832(17) Å<br>$\beta$ = 101.342(2)° | <i>a</i> = 8.2699(7) Å<br><i>b</i> = 10.5607(7) Å<br><i>c</i> = 11.9762(10) Å<br>$\alpha$ = 113.534(2)°<br>$\beta$ = 90.179(3)°<br>$\gamma$ = 112.733(3)° | <i>a</i> = 11.9553(11) Å<br><i>b</i> = 8.2563(8) Å<br><i>c</i> = 17.8738(18) Å<br>$\beta$ = 101.343(3)° | <i>a</i> = 8.2775(4) Å<br><i>b</i> = 10.5829(4) Å<br><i>c</i> = 11.9879(5) Å<br>$\alpha$ = 113.5061(11)°<br>$\beta$ = 90.1124(13)°<br>$\gamma$ = 112.8047(12)° | <i>a</i> = 11.9735(7) Å<br><i>b</i> = 8.2678(5) Å<br><i>c</i> = 17.9172(12) Å<br>$\beta$ = 101.3605(17)° | <i>a</i> = 8.2770(4) Å<br><i>b</i> = 10.5807(4) Å<br><i>c</i> = 11.9867(5) Å<br>$\alpha$ = 113.5057(12)°<br>$\beta$ = 90.1279(14)°<br>$\gamma$ = 112.7902(12)° | <i>a</i> = 11.9706(8) Å<br><i>b</i> = 8.2662(6) Å<br><i>c</i> = 17.9123(13) Å<br>$\beta$ = 101.3588(18)° | <i>a</i> = 8.2823(5) Å<br><i>b</i> = 10.6037(5) Å<br><i>c</i> = 11.9909(7) Å<br>$\alpha$ = 113.4279(16)°<br>$\beta$ = 90.0435(19)°<br>$\gamma$ = 112.8878(17)° | <i>a</i> = 11.9833(5) Å<br><i>b</i> = 10.6032(3) Å<br><i>c</i> = 17.9669(8) Å<br>$\beta$ = 101.4018(10)° | <i>a</i> = 8.2827(3) Å<br><i>b</i> = 10.6032(3) Å<br><i>c</i> = 11.9913(4) Å<br>$\alpha$ = 113.4349(8)°<br>$\beta$ = 90.0430(9)°<br>$\gamma$ = 112.8814(8)° | <i>a</i> = 11.9840(5) Å<br><i>b</i> = 8.2774(3) Å<br><i>c</i> = 17.9659(8) Å<br>$\beta$ = 101.3997(10)° |                                                                 |
| <i>V</i> / Å <sup>3</sup>                      | 1732.2(3)                                                                                               | 869.00(12)                                                                                                                                                | 1729.8(3)                                                                                               | 872.36(7)                                                                                                                                                      | 1738.95(19)                                                                                              | 872.11(7)                                                                                                                                                      | 1737.7(2)                                                                                                | 875.02(9)                                                                                                                                                      | 1746.89(12)                                                                                              | 875.04(5)                                                                                                                                                   | 1746.99(12)                                                                                             |                                                                 |
| <i>Z</i>                                       | 8                                                                                                       | 4                                                                                                                                                         | 8                                                                                                       | 4                                                                                                                                                              | 8                                                                                                        | 4                                                                                                                                                              | 8                                                                                                        | 4                                                                                                                                                              | 8                                                                                                        | 4                                                                                                                                                           | 8                                                                                                       |                                                                 |
| <i>D<sub>x</sub></i> / g cm <sup>-3</sup>      | 1.060                                                                                                   | 1.057                                                                                                                                                     | 1.062                                                                                                   | 1.053                                                                                                                                                          | 1.056                                                                                                    | 1.053                                                                                                                                                          | 1.057 g/cm <sup>3</sup>                                                                                  | 1.049 g/cm <sup>3</sup>                                                                                                                                        | 1.051 g/cm <sup>3</sup>                                                                                  | 1.049 g/cm <sup>3</sup>                                                                                                                                     | 1.051 g/cm <sup>3</sup>                                                                                 |                                                                 |
| $\mu$ / mm <sup>-1</sup>                       | 0.058                                                                                                   | 0.058                                                                                                                                                     | 0.058                                                                                                   | 0.058                                                                                                                                                          | 0.058                                                                                                    | 0.058                                                                                                                                                          | 0.058 mm <sup>-1</sup>                                                                                   | 0.058 mm <sup>-1</sup>                                                                                                                                         | 0.058 mm <sup>-1</sup>                                                                                   | 0.058 mm <sup>-1</sup>                                                                                                                                      | 0.058 mm <sup>-1</sup>                                                                                  |                                                                 |
| <i>F</i> (000)                                 | 624                                                                                                     | 312                                                                                                                                                       | 624                                                                                                     | 312                                                                                                                                                            | 624                                                                                                      | 312                                                                                                                                                            | 624                                                                                                      | 312                                                                                                                                                            | 624                                                                                                      | 312                                                                                                                                                         | 624                                                                                                     |                                                                 |
| $\theta_{\min}$ $\theta_{\max}$                | 2.32°, 25.05°                                                                                           | 2.32°, 25.05°                                                                                                                                             | 2.32°, 25.05°                                                                                           | 2.32°, 25.05°                                                                                                                                                  | 2.32°, 25.04°                                                                                            | 2.32°, 25.05°                                                                                                                                                  | 2.32°, 25.05°                                                                                            | 2.31°, 25.05°                                                                                                                                                  | 2.31°, 25.04°                                                                                            | 2.31°, 25.05°                                                                                                                                               | 2.31°, 25.04°                                                                                           |                                                                 |
| Index range                                    | -14 ≤ <i>h</i> ≤ 14<br>-9 ≤ <i>k</i> ≤ 9<br>-21 ≤ <i>l</i> ≤ 21                                         | -9 ≤ <i>h</i> ≤ 9<br>-11 ≤ <i>k</i> ≤ 11<br>-14 ≤ <i>l</i> ≤ 14                                                                                           | -14 ≤ <i>h</i> ≤ 14<br>-9 ≤ <i>k</i> ≤ 9<br>-21 ≤ <i>l</i> ≤ 21                                         | -9 ≤ <i>h</i> ≤ 9<br>-11 ≤ <i>k</i> ≤ 11<br>-14 ≤ <i>l</i> ≤ 14                                                                                                | -14 ≤ <i>h</i> ≤ 14<br>-9 ≤ <i>k</i> ≤ 9<br>-21 ≤ <i>l</i> ≤ 21                                          | -9 ≤ <i>h</i> ≤ 9<br>-11 ≤ <i>k</i> ≤ 11<br>-14 ≤ <i>l</i> ≤ 14                                                                                                | -14 ≤ <i>h</i> ≤ 14<br>-9 ≤ <i>k</i> ≤ 9<br>-21 ≤ <i>l</i> ≤ 21                                          | -14 ≤ <i>h</i> ≤ 14<br>-9 ≤ <i>k</i> ≤ 9<br>-21 ≤ <i>l</i> ≤ 21                                                                                                | -9 ≤ <i>h</i> ≤ 9<br>-11 ≤ <i>k</i> ≤ 11<br>-14 ≤ <i>l</i> ≤ 14                                          | -14 ≤ <i>h</i> ≤ 14<br>-12 ≤ <i>k</i> ≤ 9<br>-21 ≤ <i>l</i> ≤ 21                                                                                            | -9 ≤ <i>h</i> ≤ 9<br>-9 ≤ <i>k</i> ≤ 9<br>-14 ≤ <i>l</i> ≤ 14                                           | -14 ≤ <i>h</i> ≤ 14<br>-9 ≤ <i>k</i> ≤ 9<br>-21 ≤ <i>l</i> ≤ 21 |
| Reflections collected                          | 10072                                                                                                   | 10418                                                                                                                                                     | 10030                                                                                                   | 10556                                                                                                                                                          | 9991                                                                                                     | 10639                                                                                                                                                          | 10181                                                                                                    | 10713                                                                                                                                                          | 10310                                                                                                    | 10768                                                                                                                                                       | 10367                                                                                                   |                                                                 |
| Independent reflections                        | 1514 [ <i>R<sub>int</sub></i> = 0.0413]                                                                 | 2849 [ <i>R<sub>int</sub></i> = 0.0214]                                                                                                                   | 1511 [ <i>R<sub>int</sub></i> = 0.0441]                                                                 | 2863 [ <i>R<sub>int</sub></i> = 0.0157]                                                                                                                        | 1522 [ <i>R<sub>int</sub></i> = 0.0282]                                                                  | 2871 [ <i>R<sub>int</sub></i> = 0.0189]                                                                                                                        | 1522 [ <i>R<sub>int</sub></i> = 0.0336]                                                                  | 2893 [ <i>R<sub>int</sub></i> = 0.0166]                                                                                                                        | 1531 [ <i>R<sub>int</sub></i> = 0.0190]                                                                  | 2894 [ <i>R<sub>int</sub></i> = 0.0192]                                                                                                                     | 1530 [ <i>R<sub>int</sub></i> = 0.0228]                                                                 |                                                                 |
| Completeness for $\theta_{\max}$               | 98.4%                                                                                                   | 97.4%                                                                                                                                                     | 98.3%                                                                                                   | 97.8%                                                                                                                                                          | 98.4%                                                                                                    | 97.9%                                                                                                                                                          | 98.4%                                                                                                    | 93.2%                                                                                                                                                          | 98.6%                                                                                                    | 93.2%                                                                                                                                                       | 98.6%                                                                                                   |                                                                 |
| Absorption correction                          | multi-scan                                                                                              | multi-scan                                                                                                                                                | multi-scan                                                                                              | multi-scan                                                                                                                                                     | multi-scan                                                                                               | multi-scan                                                                                                                                                     | multi-scan                                                                                               | multi-scan                                                                                                                                                     | multi-scan                                                                                               | multi-scan                                                                                                                                                  | multi-scan                                                                                              |                                                                 |
| <i>T<sub>mins</sub></i> <i>T<sub>max</sub></i> | 0.977, 0.966                                                                                            | 0.977, 0.966                                                                                                                                              | 0.977, 0.966                                                                                            | 0.977, 0.966                                                                                                                                                   | 0.977, 0.966                                                                                             | 0.977, 0.966                                                                                                                                                   | 0.977, 0.966                                                                                             | 0.977, 0.966                                                                                                                                                   | 0.977, 0.966                                                                                             | 0.977, 0.966                                                                                                                                                | 0.977, 0.966                                                                                            |                                                                 |
| Refinement method                              | Full matrix LSQ                                                                                         | Full matrix LSQ                                                                                                                                           | Full matrix LSQ                                                                                         | Full matrix LSQ                                                                                                                                                | Full matrix LSQ                                                                                          | Full matrix LSQ                                                                                                                                                | Full matrix LSQ                                                                                          | Full matrix LSQ                                                                                                                                                | Full matrix LSQ                                                                                          | Full matrix LSQ                                                                                                                                             | Full matrix LSQ                                                                                         |                                                                 |
| Reflections/ restraints/ parameters            | 1514 / 0 / 91                                                                                           | 2849 / 0 / 182                                                                                                                                            | 1511 / 0 / 91                                                                                           | 2863 / 0 / 182                                                                                                                                                 | 1522 / 0 / 91                                                                                            | 2871 / 0 / 182                                                                                                                                                 | 1522 / 0 / 91                                                                                            | 2893 / 92 / 264                                                                                                                                                | 1531 / 55 / 133                                                                                          | 2894 / 110 / 264                                                                                                                                            | 1530 / 31 / 133                                                                                         |                                                                 |
| Goof on <i>F</i> <sup>2</sup>                  | 1.170                                                                                                   | 1.044                                                                                                                                                     | 1.168                                                                                                   | 1.066                                                                                                                                                          | 1.065                                                                                                    | 1.046                                                                                                                                                          | 1.089                                                                                                    | 1.027                                                                                                                                                          | 1.056                                                                                                    | 1.023                                                                                                                                                       | 1.037                                                                                                   |                                                                 |
| <i>R</i> [ <i>I</i> > 2 $\sigma$ ( <i>I</i> )] | <i>R</i> 1 = 0.0627<br><i>wR</i> 2 = 0.1283<br>[1390 data; <i>I</i> > 2 $\sigma$ ( <i>I</i> )]          | <i>R</i> 1 = 0.0409<br><i>wR</i> 2 = 0.0937<br>[2522 data; <i>I</i> > 2 $\sigma$ ( <i>I</i> )]                                                            | <i>R</i> 1 = 0.0643<br><i>wR</i> 2 = 0.1311<br>[1393 data; <i>I</i> > 2 $\sigma$ ( <i>I</i> )]          | <i>R</i> 1 = 0.0424<br><i>wR</i> 2 = 0.1036<br>[2473 data; <i>I</i> > 2 $\sigma$ ( <i>I</i> )]                                                                 | <i>R</i> 1 = 0.0494<br><i>wR</i> 2 = 0.1150<br>[1360 data; <i>I</i> > 2 $\sigma$ ( <i>I</i> )]           | <i>R</i> 1 = 0.0417<br><i>wR</i> 2 = 0.1011<br>[2486 data; <i>I</i> > 2 $\sigma$ ( <i>I</i> )]                                                                 | <i>R</i> 1 = 0.0511<br><i>wR</i> 2 = 0.1157<br>[1371 data; <i>I</i> > 2 $\sigma$ ( <i>I</i> )]           | <i>R</i> 1 = 0.0414<br><i>wR</i> 2 = 0.0978<br>[2399 data; <i>I</i> > 2 $\sigma$ ( <i>I</i> )]                                                                 | <i>R</i> 1 = 0.0399<br><i>wR</i> 2 = 0.1014<br>[1341 data; <i>I</i> > 2 $\sigma$ ( <i>I</i> )]           | <i>R</i> 1 = 0.0422<br><i>wR</i> 2 = 0.0967<br>[2438 data; <i>I</i> > 2 $\sigma$ ( <i>I</i> )]                                                              | <i>R</i> 1 = 0.0410<br><i>wR</i> 2 = 0.0959<br>[1364 data; <i>I</i> > 2 $\sigma$ ( <i>I</i> )]          |                                                                 |
| <i>R</i> (all data)                            | <i>R</i> 1 = 0.0675<br><i>wR</i> 2 = 0.1317                                                             | <i>R</i> 1 = 0.0480<br><i>wR</i> 2 = 0.1004                                                                                                               | <i>R</i> 1 = 0.0688<br><i>wR</i> 2 = 0.1339                                                             | <i>R</i> 1 = 0.0505<br><i>wR</i> 2 = 0.1124                                                                                                                    | <i>R</i> 1 = 0.0549<br><i>wR</i> 2 = 0.1198                                                              | <i>R</i> 1 = 0.0495<br><i>wR</i> 2 = 0.1084                                                                                                                    | <i>R</i> 1 = 0.0561<br><i>wR</i> 2 = 0.1199                                                              | <i>R</i> 1 = 0.0500<br><i>wR</i> 2 = 0.1061                                                                                                                    | <i>R</i> 1 = 0.0459<br><i>wR</i> 2 = 0.1074                                                              | <i>R</i> 1 = 0.0504<br><i>wR</i> 2 = 0.1043                                                                                                                 | <i>R</i> 1 = 0.0462<br><i>wR</i> 2 = 0.1004                                                             |                                                                 |
| Extinction                                     | -                                                                                                       | -                                                                                                                                                         | -                                                                                                       | -                                                                                                                                                              | -                                                                                                        | -                                                                                                                                                              | -                                                                                                        | 0.008(2)                                                                                                                                                       | 0.0018(7)                                                                                                | 0.007(3)                                                                                                                                                    | 0.0013(7)                                                                                               |                                                                 |
| $\rho_{\min}$ $\rho_{\max}$ / eÅ <sup>-3</sup> | 0.203, -0.175                                                                                           | 0.168, -0.160                                                                                                                                             | 0.216, -0.166                                                                                           | 0.191, -0.152                                                                                                                                                  | 0.194, -0.151                                                                                            | 0.201, -0.148                                                                                                                                                  | 0.208, -0.156                                                                                            | 0.154, -0.138                                                                                                                                                  | 0.186, -0.146                                                                                            | 0.158, -0.131                                                                                                                                               | 0.170, -0.137                                                                                           |                                                                 |

 cd = cooling down, hu = heating up. Columns coloured in orange stand for data present in the **Table S3** in ESI.

**Table S4.** Crystal data and refinement parameters for cis-dekalin single crystal refined in two space groups at various temperatures. Continuation.

| Name                                                 | c_Dec_k180K_160K_cd_aP                                                                                                                                       | c_Dec_k180K_160K_cd_mI                                                                                   | c_Dec_k180K_160K_hu_aP                                                                                                                                        | c_Dec_k180K_160K_hu_mI                                                                                   | c_Dec_k180K_170K_cd_aP                                                                                                                                        | c_Dec_k180K_170K_cd_mI                                                                                   | c_Dec_k180K_170K_hu_aP                                                                                                                                        | c_Dec_k180K_170K_hu_mI                                                                                   | c_Dec_k180K_180K_cd_aP                                                                                                                                          | c_Dec_k180K_180K_cd_mI                                                                                   | c_Dec_k180K_180K_hu_aP                                                                                                                                         |                                                                 |
|------------------------------------------------------|--------------------------------------------------------------------------------------------------------------------------------------------------------------|----------------------------------------------------------------------------------------------------------|---------------------------------------------------------------------------------------------------------------------------------------------------------------|----------------------------------------------------------------------------------------------------------|---------------------------------------------------------------------------------------------------------------------------------------------------------------|----------------------------------------------------------------------------------------------------------|---------------------------------------------------------------------------------------------------------------------------------------------------------------|----------------------------------------------------------------------------------------------------------|-----------------------------------------------------------------------------------------------------------------------------------------------------------------|----------------------------------------------------------------------------------------------------------|----------------------------------------------------------------------------------------------------------------------------------------------------------------|-----------------------------------------------------------------|
| Compound used for crystallization                    | Isomer <i>cis</i> at 180K                                                                                                                                    | Isomer <i>cis</i> at 180K                                                                                | Isomer <i>cis</i> at 180K                                                                                                                                     | Isomer <i>cis</i> at 180K                                                                                | Isomer <i>cis</i> at 180K                                                                                                                                     | Isomer <i>cis</i> at 180K                                                                                | Isomer <i>cis</i> at 180K                                                                                                                                     | Isomer <i>cis</i> at 180K                                                                                | Isomer <i>cis</i> at 180K                                                                                                                                       | Isomer <i>cis</i> at 180K                                                                                | Isomer <i>cis</i> at 180K                                                                                                                                      |                                                                 |
| Formula                                              | C <sub>10</sub> H <sub>18</sub>                                                                                                                              | C <sub>10</sub> H <sub>18</sub>                                                                          | C <sub>10</sub> H <sub>18</sub>                                                                                                                               | C <sub>10</sub> H <sub>18</sub>                                                                          | C <sub>10</sub> H <sub>18</sub>                                                                                                                               | C <sub>10</sub> H <sub>18</sub>                                                                          | C <sub>10</sub> H <sub>18</sub>                                                                                                                               | C <sub>10</sub> H <sub>18</sub>                                                                          | C <sub>10</sub> H <sub>18</sub>                                                                                                                                 | C <sub>10</sub> H <sub>18</sub>                                                                          | C <sub>10</sub> H <sub>18</sub>                                                                                                                                |                                                                 |
| M <sub>r</sub> / g mol <sup>-1</sup>                 | 138.24                                                                                                                                                       | 138.24                                                                                                   | 138.24                                                                                                                                                        | 138.24                                                                                                   | 138.24                                                                                                                                                        | 138.24                                                                                                   | 138.24                                                                                                                                                        | 138.24                                                                                                   | 138.24                                                                                                                                                          | 138.24                                                                                                   | 138.24                                                                                                                                                         |                                                                 |
| T/ K                                                 | 160(2)                                                                                                                                                       | 160(2)                                                                                                   | 160(2)                                                                                                                                                        | 160(2)                                                                                                   | 170(2)                                                                                                                                                        | 170(2)                                                                                                   | 170(2)                                                                                                                                                        | 170(2)                                                                                                   | 170(2)                                                                                                                                                          | 180(2)                                                                                                   | 180(2)                                                                                                                                                         |                                                                 |
| λ/ Å                                                 | 0.71073                                                                                                                                                      | 0.71073                                                                                                  | 0.71073                                                                                                                                                       | 0.71073                                                                                                  | 0.71073                                                                                                                                                       | 0.71073                                                                                                  | 0.71073                                                                                                                                                       | 0.71073                                                                                                  | 0.71073                                                                                                                                                         | 0.71073                                                                                                  | 0.71073                                                                                                                                                        |                                                                 |
| Crystal size/ mm                                     | 0.400×0.400×0.600                                                                                                                                            | 0.400×0.400×0.600                                                                                        | 0.400×0.400×0.600                                                                                                                                             | 0.400×0.400×0.600                                                                                        | 0.400×0.400×0.600                                                                                                                                             | 0.400×0.400×0.600                                                                                        | 0.400×0.400×0.600                                                                                                                                             | 0.400×0.400×0.600                                                                                        | 0.400×0.400×0.600                                                                                                                                               | 0.400×0.400×0.600                                                                                        | 0.400×0.400×0.600                                                                                                                                              |                                                                 |
| Crystal system                                       | triclinic                                                                                                                                                    | monoclinic                                                                                               | triclinic                                                                                                                                                     | monoclinic                                                                                               | triclinic                                                                                                                                                     | monoclinic                                                                                               | triclinic                                                                                                                                                     | monoclinic                                                                                               | triclinic                                                                                                                                                       | monoclinic                                                                                               | triclinic                                                                                                                                                      |                                                                 |
| Space group                                          | <i>P</i> $\bar{1}$                                                                                                                                           | <i>I</i> 2/a                                                                                             | <i>P</i> $\bar{1}$                                                                                                                                            | <i>I</i> 2/a                                                                                             | <i>P</i> $\bar{1}$                                                                                                                                            | <i>I</i> 2/a                                                                                             | <i>P</i> $\bar{1}$                                                                                                                                            | <i>I</i> 2/a                                                                                             | <i>P</i> $\bar{1}$                                                                                                                                              | <i>I</i> 2/a                                                                                             | <i>P</i> $\bar{1}$                                                                                                                                             |                                                                 |
| Unit cell parameters/ Å, °                           | <i>a</i> = 8.2845(3) Å<br><i>b</i> = 10.6177(3) Å<br><i>c</i> = 11.9890(4) Å<br><i>α</i> = 113.3017(8)°<br><i>β</i> = 90.0282(9)°<br><i>γ</i> = 112.8787(9)° | <i>a</i> = 11.9832(4) Å<br><i>b</i> = 8.2803(3) Å<br><i>c</i> = 18.0209(6) Å<br><i>β</i> = 101.4727(10)° | <i>a</i> = 8.2838(3) Å<br><i>b</i> = 10.6169(3) Å<br><i>c</i> = 11.9887(4) Å<br><i>α</i> = 113.3097(8)°<br><i>β</i> = 90.0250(10)°<br><i>γ</i> = 112.8789(9)° | <i>a</i> = 11.9843(4) Å<br><i>b</i> = 8.2804(3) Å<br><i>c</i> = 18.0191(6) Å<br><i>β</i> = 101.4692(10)° | <i>a</i> = 8.2847(3) Å<br><i>b</i> = 10.6319(3) Å<br><i>c</i> = 11.9834(4) Å<br><i>α</i> = 113.1322(9)°<br><i>β</i> = 90.0204(10)°<br><i>γ</i> = 112.8539(9)° | <i>a</i> = 11.9781(4) Å<br><i>b</i> = 8.2808(3) Å<br><i>c</i> = 18.0841(7) Å<br><i>β</i> = 101.5685(10)° | <i>a</i> = 8.2852(3) Å<br><i>b</i> = 10.6314(3) Å<br><i>c</i> = 11.9844(4) Å<br><i>α</i> = 113.1411(9)°<br><i>β</i> = 90.0216(10)°<br><i>γ</i> = 112.8556(9)° | <i>a</i> = 11.9791(4) Å<br><i>b</i> = 8.2813(3) Å<br><i>c</i> = 18.0809(7) Å<br><i>β</i> = 101.5642(10)° | <i>a</i> = 8.2855(3) Å<br><i>b</i> = 10.6479(3) Å<br><i>c</i> = 11.9802(4) Å<br><i>α</i> = 112.9570(10)°<br><i>β</i> = 90.0180(10)°<br><i>γ</i> = 112.8180(10)° | <i>a</i> = 11.9739(4) Å<br><i>b</i> = 8.2807(3) Å<br><i>c</i> = 18.1504(7) Å<br><i>β</i> = 101.6659(10)° | <i>a</i> = 8.2862(3) Å<br><i>b</i> = 10.6476(3) Å<br><i>c</i> = 11.9806(4) Å<br><i>α</i> = 112.9610(9)°<br><i>β</i> = 90.0220(10)°<br><i>γ</i> = 112.8190(10)° |                                                                 |
| V/ Å <sup>3</sup>                                    | 877.41(5)                                                                                                                                                    | 1752.39(11)                                                                                              | 877.19(5)                                                                                                                                                     | 1752.42(11)                                                                                              | 879.77(5)                                                                                                                                                     | 1757.29(11)                                                                                              | 879.77(5)                                                                                                                                                     | 1757.26(11)                                                                                              | 882.64(5)                                                                                                                                                       | 1762.48(11)                                                                                              | 882.66(5)                                                                                                                                                      |                                                                 |
| Z                                                    | 4                                                                                                                                                            | 8                                                                                                        | 4                                                                                                                                                             | 8                                                                                                        | 4                                                                                                                                                             | 8                                                                                                        | 4                                                                                                                                                             | 8                                                                                                        | 4                                                                                                                                                               | 8                                                                                                        | 4                                                                                                                                                              |                                                                 |
| D <sub>x</sub> / g cm <sup>-3</sup>                  | 1.047 g/cm <sup>3</sup>                                                                                                                                      | 1.048 g/cm <sup>3</sup>                                                                                  | 1.047 g/cm <sup>3</sup>                                                                                                                                       | 1.048 g/cm <sup>3</sup>                                                                                  | 1.044 g/cm <sup>3</sup>                                                                                                                                       | 1.045 g/cm <sup>3</sup>                                                                                  | 1.044 g/cm <sup>3</sup>                                                                                                                                       | 1.045 g/cm <sup>3</sup>                                                                                  | 1.040 g/cm <sup>3</sup>                                                                                                                                         | 1.042 g/cm <sup>3</sup>                                                                                  | 1.040 g/cm <sup>3</sup>                                                                                                                                        |                                                                 |
| μ/ mm <sup>-1</sup>                                  | 0.058 mm <sup>-1</sup>                                                                                                                                       | 0.058 mm <sup>-1</sup>                                                                                   | 0.058 mm <sup>-1</sup>                                                                                                                                        | 0.058 mm <sup>-1</sup>                                                                                   | 0.057 mm <sup>-1</sup>                                                                                                                                        | 0.057 mm <sup>-1</sup>                                                                                   | 0.057 mm <sup>-1</sup>                                                                                                                                        | 0.057 mm <sup>-1</sup>                                                                                   | 0.057 mm <sup>-1</sup>                                                                                                                                          | 0.057 mm <sup>-1</sup>                                                                                   | 0.057 mm <sup>-1</sup>                                                                                                                                         |                                                                 |
| F(000)                                               | 312                                                                                                                                                          | 624                                                                                                      | 312                                                                                                                                                           | 624                                                                                                      | 312                                                                                                                                                           | 624                                                                                                      | 312                                                                                                                                                           | 624                                                                                                      | 312                                                                                                                                                             | 624                                                                                                      | 312                                                                                                                                                            |                                                                 |
| θ <sub>min</sub> θ <sub>max</sub>                    | 2.71°, 25.05°                                                                                                                                                | 2.31°, 25.05°                                                                                            | 2.71°, 25.05°                                                                                                                                                 | 2.31°, 25.05°                                                                                            | 2.71°, 25.05°                                                                                                                                                 | 2.71°, 25.05°                                                                                            | 2.71°, 25.05°                                                                                                                                                 | 2.71°, 25.05°                                                                                            | 2.71°, 25.05°                                                                                                                                                   | 2.71°, 25.05°                                                                                            | 2.71°, 25.04°                                                                                                                                                  |                                                                 |
| Index range                                          | -9 ≤ <i>h</i> ≤ 9<br>-12 ≤ <i>k</i> ≤ 11<br>-14 ≤ <i>l</i> ≤ 14                                                                                              | -14 ≤ <i>h</i> ≤ 14<br>-9 ≤ <i>k</i> ≤ 9<br>-21 ≤ <i>l</i> ≤ 21                                          | -9 ≤ <i>h</i> ≤ 9<br>-12 ≤ <i>k</i> ≤ 11<br>-14 ≤ <i>l</i> ≤ 14                                                                                               | -14 ≤ <i>h</i> ≤ 14<br>-9 ≤ <i>k</i> ≤ 9<br>-21 ≤ <i>l</i> ≤ 21                                          | -9 ≤ <i>h</i> ≤ 9<br>-12 ≤ <i>k</i> ≤ 11<br>-14 ≤ <i>l</i> ≤ 14                                                                                               | -14 ≤ <i>h</i> ≤ 14<br>-9 ≤ <i>k</i> ≤ 9<br>-12 ≤ <i>l</i> ≤ 14                                          | -9 ≤ <i>h</i> ≤ 9<br>-12 ≤ <i>k</i> ≤ 11<br>-14 ≤ <i>l</i> ≤ 14                                                                                               | -14 ≤ <i>h</i> ≤ 14<br>-9 ≤ <i>k</i> ≤ 9<br>-12 ≤ <i>l</i> ≤ 14                                          | -14 ≤ <i>h</i> ≤ 14<br>-9 ≤ <i>k</i> ≤ 9<br>-12 ≤ <i>l</i> ≤ 14                                                                                                 | -14 ≤ <i>h</i> ≤ 14<br>-9 ≤ <i>k</i> ≤ 9<br>-21 ≤ <i>l</i> ≤ 21                                          | -14 ≤ <i>h</i> ≤ 14<br>-9 ≤ <i>k</i> ≤ 9<br>-21 ≤ <i>l</i> ≤ 21                                                                                                | -9 ≤ <i>h</i> ≤ 9<br>-12 ≤ <i>k</i> ≤ 11<br>-14 ≤ <i>l</i> ≤ 14 |
| Reflections collected                                | 10773                                                                                                                                                        | 10355                                                                                                    | 10811                                                                                                                                                         | 10395                                                                                                    | 10783                                                                                                                                                         | 10346                                                                                                    | 10842                                                                                                                                                         | 10437                                                                                                    | 10811                                                                                                                                                           | 10405                                                                                                    | 10850                                                                                                                                                          |                                                                 |
| Independent reflections                              | 2905 [ <i>R</i> <sub>int</sub> = 0.0163]                                                                                                                     | 1536 [ <i>R</i> <sub>int</sub> = 0.0177]                                                                 | 2907 [ <i>R</i> <sub>int</sub> = 0.0191]                                                                                                                      | 1537 [ <i>R</i> <sub>int</sub> = 0.0216]                                                                 | 2914 [ <i>R</i> <sub>int</sub> = 0.0170]                                                                                                                      | 1538 [ <i>R</i> <sub>int</sub> = 0.0191]                                                                 | 2916 [ <i>R</i> <sub>int</sub> = 0.0214]                                                                                                                      | 1536 [ <i>R</i> <sub>int</sub> = 0.0265]                                                                 | 2921 [ <i>R</i> <sub>int</sub> = 0.0174]                                                                                                                        | 1540 [ <i>R</i> <sub>int</sub> = 0.0195]                                                                 | 2922 [ <i>R</i> <sub>int</sub> = 0.0244]                                                                                                                       |                                                                 |
| Completeness for θ <sub>max</sub>                    | 93.2%                                                                                                                                                        | 98.7%                                                                                                    | 93.4%                                                                                                                                                         | 98.7%                                                                                                    | 93.5%                                                                                                                                                         | 98.7%                                                                                                    | 93.6%                                                                                                                                                         | 98.6%                                                                                                    | 93.6%                                                                                                                                                           | 98.7%                                                                                                    | 93.7%                                                                                                                                                          |                                                                 |
| Absorption correction                                | multi-scan                                                                                                                                                   | multi-scan                                                                                               | multi-scan                                                                                                                                                    | multi-scan                                                                                               | multi-scan                                                                                                                                                    | multi-scan                                                                                               | multi-scan                                                                                                                                                    | none                                                                                                     | multi-scan                                                                                                                                                      | multi-scan                                                                                               | multi-scan                                                                                                                                                     |                                                                 |
| T <sub>min</sub> T <sub>max</sub>                    | 0.977, 0.966                                                                                                                                                 | 0.977, 0.966                                                                                             | 0.977, 0.966                                                                                                                                                  | 0.977, 0.966                                                                                             | 0.977, 0.966                                                                                                                                                  | 0.977, 0.966                                                                                             | 0.977, 0.966                                                                                                                                                  | 0.977, 0.966                                                                                             | 0.977, 0.966                                                                                                                                                    | 0.977, 0.966                                                                                             | 0.977, 0.966                                                                                                                                                   |                                                                 |
| Refinement method                                    | Full matrix LSQ                                                                                                                                              | Full matrix LSQ                                                                                          | Full matrix LSQ                                                                                                                                               | Full matrix LSQ                                                                                          | Full matrix LSQ                                                                                                                                               | Full matrix LSQ                                                                                          | Full matrix LSQ                                                                                                                                               | Full matrix LSQ                                                                                          | Full matrix LSQ                                                                                                                                                 | Full matrix LSQ                                                                                          | Full matrix LSQ                                                                                                                                                |                                                                 |
| Reflections/ restraints/ parameters                  | 2905 / 0 / 264                                                                                                                                               | 1536 / 25 / 133                                                                                          | 2907 / 0 / 264                                                                                                                                                | 1537 / 25 / 133                                                                                          | 2914 / 50 / 264                                                                                                                                               | 1538 / 25 / 133                                                                                          | 2916 / 0 / 263                                                                                                                                                | 1536 / 25 / 133                                                                                          | 2921 / 50 / 264                                                                                                                                                 | 1540 / 25 / 133                                                                                          | 2922 / 0 / 263                                                                                                                                                 |                                                                 |
| GoF on F <sup>2</sup>                                | 1.053                                                                                                                                                        | 1.045                                                                                                    | 1.071                                                                                                                                                         | 1.043                                                                                                    | 1.023                                                                                                                                                         | 1.048                                                                                                    | 1.055                                                                                                                                                         | 1.044                                                                                                    | 1.038                                                                                                                                                           | 1.051                                                                                                    | 1.051                                                                                                                                                          |                                                                 |
| R [ <i>I</i> > 2σ( <i>I</i> )]                       | <i>R</i> 1 = 0.0408<br><i>wR</i> 2 = 0.1014<br>[2377 data; <i>I</i> > 2σ( <i>I</i> )]                                                                        | <i>R</i> 1 = 0.0398<br><i>wR</i> 2 = 0.0993<br>[1334 data; <i>I</i> > 2σ( <i>I</i> )]                    | <i>R</i> 1 = 0.0420<br><i>wR</i> 2 = 0.1038<br>[2405 data; <i>I</i> > 2σ( <i>I</i> )]                                                                         | <i>R</i> 1 = 0.0412<br><i>wR</i> 2 = 0.0992<br>[1354 data; <i>I</i> > 2σ( <i>I</i> )]                    | <i>R</i> 1 = 0.0450<br><i>wR</i> 2 = 0.1057<br>[2345 data; <i>I</i> > 2σ( <i>I</i> )]                                                                         | <i>R</i> 1 = 0.0409<br><i>wR</i> 2 = 0.1037<br>[1319 data; <i>I</i> > 2σ( <i>I</i> )]                    | <i>R</i> 1 = 0.0442<br><i>wR</i> 2 = 0.1074<br>[2360 data; <i>I</i> > 2σ( <i>I</i> )]                                                                         | <i>R</i> 1 = 0.0412<br><i>wR</i> 2 = 0.1007<br>[1328 data; <i>I</i> > 2σ( <i>I</i> )]                    | <i>R</i> 1 = 0.0469<br><i>wR</i> 2 = 0.1125<br>[2303 data; <i>I</i> > 2σ( <i>I</i> )]                                                                           | <i>R</i> 1 = 0.0419<br><i>wR</i> 2 = 0.1046<br>[1297 data; <i>I</i> > 2σ( <i>I</i> )]                    | <i>R</i> 1 = 0.0473<br><i>wR</i> 2 = 0.1143<br>[2315 data; <i>I</i> > 2σ( <i>I</i> )]                                                                          |                                                                 |
| R (all data)                                         | <i>R</i> 1 = 0.0506<br><i>wR</i> 2 = 0.1112                                                                                                                  | <i>R</i> 1 = 0.0461<br><i>wR</i> 2 = 0.1061                                                              | <i>R</i> 1 = 0.0510<br><i>wR</i> 2 = 0.1137                                                                                                                   | <i>R</i> 1 = 0.0469<br><i>wR</i> 2 = 0.1052                                                              | <i>R</i> 1 = 0.0565<br><i>wR</i> 2 = 0.1164                                                                                                                   | <i>R</i> 1 = 0.0484<br><i>wR</i> 2 = 0.1111                                                              | <i>R</i> 1 = 0.0551<br><i>wR</i> 2 = 0.1194                                                                                                                   | <i>R</i> 1 = 0.0477<br><i>wR</i> 2 = 0.1083                                                              | <i>R</i> 1 = 0.0604<br><i>wR</i> 2 = 0.1257                                                                                                                     | <i>R</i> 1 = 0.0504<br><i>wR</i> 2 = 0.1135                                                              | <i>R</i> 1 = 0.0605<br><i>wR</i> 2 = 0.1286                                                                                                                    |                                                                 |
| Extinction                                           | 0.009(3)                                                                                                                                                     | 0.0027(7)                                                                                                | 0.007(3)                                                                                                                                                      | 0.0021(7)                                                                                                | 0.011(3)                                                                                                                                                      | 0.0024(8)                                                                                                | -                                                                                                                                                             | 0.0028(9)                                                                                                | 0.013(3)                                                                                                                                                        | 0.0035(8)                                                                                                | -                                                                                                                                                              |                                                                 |
| ρ <sub>min</sub> ρ <sub>max</sub> / eÅ <sup>-3</sup> | 0.127, -0.138                                                                                                                                                | 0.156, -0.135                                                                                            | 0.128, -0.149                                                                                                                                                 | 0.150, -0.141                                                                                            | 0.169, -0.127                                                                                                                                                 | 0.129, -0.122                                                                                            | 0.133, -0.138                                                                                                                                                 | 0.127, -0.134                                                                                            | 0.180, -0.124                                                                                                                                                   | 0.115, -0.109                                                                                            | 0.150, -0.134                                                                                                                                                  |                                                                 |

 cd = cooling down, hu = heating up. Columns coloured in orange stand for data present in the **Table S3** in ESI.

**Table S4.** Crystal data and refinement parameters for cis-dekalin single crystal refined in two space groups at various temperatures. Continuation.

| Name                                                  | c_Dec_k180K_180K_hu_ml                                                                                  | c_Dec_k180K_190K_hu_aP                                                                                                                                   | c_Dec_k180K_190K_hu_ml                                                                                  | c_Dec_k180K_200K_hu_aP                                                                                                                                         | c_Dec_k180K_200K_hu_ml                                                                                  | c_Dec_k180K_210K_hu_aP                                                                                                                                    | c_Dec_k180K_210K_hu_ml                                                                                  | c_Dec_k180K_220K_hu_aP                                                                                                                                         | c_Dec_k180K_220K_hu_ml                                                                                  |
|-------------------------------------------------------|---------------------------------------------------------------------------------------------------------|----------------------------------------------------------------------------------------------------------------------------------------------------------|---------------------------------------------------------------------------------------------------------|----------------------------------------------------------------------------------------------------------------------------------------------------------------|---------------------------------------------------------------------------------------------------------|-----------------------------------------------------------------------------------------------------------------------------------------------------------|---------------------------------------------------------------------------------------------------------|----------------------------------------------------------------------------------------------------------------------------------------------------------------|---------------------------------------------------------------------------------------------------------|
| Compound used for crystallization                     | Isomer <i>cis</i> at 180K                                                                               | Isomer <i>cis</i> at 180K                                                                                                                                | Isomer <i>cis</i> at 180K                                                                               | Isomer <i>cis</i> at 180K                                                                                                                                      | Isomer <i>cis</i> at 180K                                                                               | Isomer <i>cis</i> at 180K                                                                                                                                 | Isomer <i>cis</i> at 180K                                                                               | Isomer <i>cis</i> at 180K                                                                                                                                      | Isomer <i>cis</i> at 180K                                                                               |
| Formula                                               | C <sub>10</sub> H <sub>18</sub>                                                                         | C <sub>10</sub> H <sub>18</sub>                                                                                                                          | C <sub>10</sub> H <sub>18</sub>                                                                         | C <sub>10</sub> H <sub>18</sub>                                                                                                                                | C <sub>10</sub> H <sub>18</sub>                                                                         | C <sub>10</sub> H <sub>18</sub>                                                                                                                           | C <sub>10</sub> H <sub>18</sub>                                                                         | C <sub>10</sub> H <sub>18</sub>                                                                                                                                | C <sub>10</sub> H <sub>18</sub>                                                                         |
| M <sub>r</sub> / g mol <sup>-1</sup>                  | 138.24                                                                                                  | 138.24                                                                                                                                                   | 138.24                                                                                                  | 138.24                                                                                                                                                         | 138.24                                                                                                  | 138.24                                                                                                                                                    | 138.24                                                                                                  | 138.24                                                                                                                                                         | 138.24                                                                                                  |
| T/ K                                                  | 180(2)                                                                                                  | 190(2)                                                                                                                                                   | 190(2)                                                                                                  | 200(2)                                                                                                                                                         | 200(2)                                                                                                  | 210(2)                                                                                                                                                    | 210(2)                                                                                                  | 220(2)                                                                                                                                                         | 220(2)                                                                                                  |
| λ/ Å                                                  | 0.71073                                                                                                 | 0.71073                                                                                                                                                  | 0.71073                                                                                                 | 0.71073                                                                                                                                                        | 0.71073                                                                                                 | 0.71073                                                                                                                                                   | 0.71073                                                                                                 | 0.71073                                                                                                                                                        | 0.71073                                                                                                 |
| Crystal size/ mm                                      | 0.400×0.400×0.600                                                                                       | 0.400×0.400×0.600                                                                                                                                        | 0.400×0.400×0.600                                                                                       | 0.400×0.400×0.600                                                                                                                                              | 0.400×0.400×0.600                                                                                       | 0.400×0.400×0.600                                                                                                                                         | 0.400×0.400×0.600                                                                                       | 0.400×0.400×0.600                                                                                                                                              | 0.400×0.400×0.600                                                                                       |
| Crystal system                                        | monoclinic                                                                                              | triclinic                                                                                                                                                | monoclinic                                                                                              | triclinic                                                                                                                                                      | monoclinic                                                                                              | triclinic                                                                                                                                                 | monoclinic                                                                                              | triclinic                                                                                                                                                      | Monoclinic                                                                                              |
| Space group                                           | <i>I</i> 2/a                                                                                            | $\bar{P}$ 1                                                                                                                                              | <i>I</i> 2/a                                                                                            | $\bar{P}$ 1                                                                                                                                                    | <i>I</i> 2/a                                                                                            | $\bar{P}$ 1                                                                                                                                               | <i>I</i> 2/a                                                                                            | $\bar{P}$ 1                                                                                                                                                    | <i>I</i> 2/a                                                                                            |
| Unit cell parameters/ Å, °                            | <i>a</i> = 11.9744(4) Å<br><i>b</i> = 8.2815(3) Å<br><i>c</i> = 18.1491(7) Å<br>$\beta$ = 101.6636(10)° | <i>a</i> = 8.2860(7) Å<br><i>b</i> = 10.6634(7) Å<br><i>c</i> = 11.9779(9) Å<br>$\alpha$ = 112.795(2)°<br>$\beta$ = 90.023(2)°<br>$\gamma$ = 112.784(2)° | <i>a</i> = 11.9719(5) Å<br><i>b</i> = 8.2815(3) Å<br><i>c</i> = 18.2151(8) Å<br>$\beta$ = 101.7554(11)° | <i>a</i> = 8.2858(4) Å<br><i>b</i> = 10.6794(3) Å<br><i>c</i> = 11.9757(5) Å<br>$\alpha$ = 112.6404(11)°<br>$\beta$ = 90.0236(12)°<br>$\gamma$ = 112.7497(12)° | <i>a</i> = 11.9701(5) Å<br><i>b</i> = 8.2817(4) Å<br><i>c</i> = 18.2789(9) Å<br>$\beta$ = 101.8375(12)° | <i>a</i> = 8.2864(7) Å<br><i>b</i> = 10.6979(7) Å<br><i>c</i> = 11.9743(10) Å<br>$\alpha$ = 112.477(2)°<br>$\beta$ = 90.024(3)°<br>$\gamma$ = 112.708(3)° | <i>a</i> = 11.9678(5) Å<br><i>b</i> = 8.2815(4) Å<br><i>c</i> = 18.3482(9) Å<br>$\beta$ = 101.9207(12)° | <i>a</i> = 8.2873(4) Å<br><i>b</i> = 10.7178(3) Å<br><i>c</i> = 11.9719(5) Å<br>$\alpha$ = 112.2899(11)°<br>$\beta$ = 90.0213(12)°<br>$\gamma$ = 112.6630(12)° | <i>a</i> = 11.9659(5) Å<br><i>b</i> = 8.2828(4) Å<br><i>c</i> = 18.4270(9) Å<br>$\beta$ = 102.0193(12)° |
| V/ Å <sup>3</sup>                                     | 1762.61(11)                                                                                             | 885.34(12)                                                                                                                                               | 1768.06(12)                                                                                             | 887.97(6)                                                                                                                                                      | 1773.50(14)                                                                                             | 891.07(12)                                                                                                                                                | 1779.30(14)                                                                                             | 894.47(6)                                                                                                                                                      | 1786.28(14)                                                                                             |
| Z                                                     | 8                                                                                                       | 4                                                                                                                                                        | 8                                                                                                       | 4                                                                                                                                                              | 8                                                                                                       | 4                                                                                                                                                         | 8                                                                                                       | 4                                                                                                                                                              | 8                                                                                                       |
| D <sub>x</sub> / g cm <sup>-3</sup>                   | 1.042 g/cm <sup>3</sup>                                                                                 | 1.037 g/cm <sup>3</sup>                                                                                                                                  | 1.039                                                                                                   | 1.034                                                                                                                                                          | 1.036                                                                                                   | 1.030                                                                                                                                                     | 1.032                                                                                                   | 1.027                                                                                                                                                          | 1.028                                                                                                   |
| μ/ mm <sup>-1</sup>                                   | 0.057 mm <sup>-1</sup>                                                                                  | 0.057 mm <sup>-1</sup>                                                                                                                                   | 0.057                                                                                                   | 0.057                                                                                                                                                          | 0.057                                                                                                   | 0.057                                                                                                                                                     | 0.057                                                                                                   | 0.056                                                                                                                                                          | 0.057                                                                                                   |
| F(000)                                                | 624                                                                                                     | 312                                                                                                                                                      | 624                                                                                                     | 312                                                                                                                                                            | 624                                                                                                     | 312                                                                                                                                                       | 624                                                                                                     | 312                                                                                                                                                            | 624                                                                                                     |
| θ <sub>mins</sub> θ <sub>max</sub>                    | 2.71°, 25.05°                                                                                           | 2.71°, 25.04°                                                                                                                                            | 2.71°, 25.05°                                                                                           | 2.26°, 25.05°                                                                                                                                                  | 2.28°, 25.05°                                                                                           | 2.27°, 25.05°                                                                                                                                             | 2.71°, 25.05°                                                                                           | 2.26°, 25.05°                                                                                                                                                  | 2.26°, 25.05°                                                                                           |
| Index range                                           | -14 ≤ <i>h</i> ≤ 14<br>-9 ≤ <i>k</i> ≤ 9<br>-21 ≤ <i>l</i> ≤ 21                                         | -9 ≤ <i>h</i> ≤ 9<br>-12 ≤ <i>k</i> ≤ 11<br>-14 ≤ <i>l</i> ≤ 14                                                                                          | -14 ≤ <i>h</i> ≤ 14<br>-9 ≤ <i>k</i> ≤ 9<br>-21 ≤ <i>l</i> ≤ 21                                         | -9 ≤ <i>h</i> ≤ 9<br>-12 ≤ <i>k</i> ≤ 11<br>-14 ≤ <i>l</i> ≤ 14                                                                                                | -14 ≤ <i>h</i> ≤ 14<br>-9 ≤ <i>k</i> ≤ 9<br>-21 ≤ <i>l</i> ≤ 21                                         | -9 ≤ <i>h</i> ≤ 9<br>-12 ≤ <i>k</i> ≤ 11<br>-14 ≤ <i>l</i> ≤ 14                                                                                           | -14 ≤ <i>h</i> ≤ 14<br>-9 ≤ <i>k</i> ≤ 11<br>-21 ≤ <i>l</i> ≤ 21                                        | -9 ≤ <i>h</i> ≤ 9<br>-12 ≤ <i>k</i> ≤ 11<br>-14 ≤ <i>l</i> ≤ 14                                                                                                | -14 ≤ <i>h</i> ≤ 14<br>-9 ≤ <i>k</i> ≤ 9<br>-21 ≤ <i>l</i> ≤ 21                                         |
| Reflections collected                                 | 10445                                                                                                   | 10885                                                                                                                                                    | 10451                                                                                                   | 10904                                                                                                                                                          | 10486                                                                                                   | 10958                                                                                                                                                     | 10543                                                                                                   | 10934                                                                                                                                                          | 10524                                                                                                   |
| Independent reflections                               | 1539 [ <i>R</i> <sub>int</sub> = 0.0297]                                                                | 2930 [ <i>R</i> <sub>int</sub> = 0.0191]                                                                                                                 | 1544 [ <i>R</i> <sub>int</sub> = 0.0209]                                                                | 2944 [ <i>R</i> <sub>int</sub> = 0.0177]                                                                                                                       | 1554 [ <i>R</i> <sub>int</sub> = 0.0199]                                                                | 2954 [ <i>R</i> <sub>int</sub> = 0.0193]                                                                                                                  | 1558 [ <i>R</i> <sub>int</sub> = 0.0217]                                                                | 2959 [ <i>R</i> <sub>int</sub> = 0.0222]                                                                                                                       | 1563 [ <i>R</i> <sub>int</sub> = 0.0255]                                                                |
| Completeness for θ <sub>max</sub>                     | 98.6%                                                                                                   | 93.5%                                                                                                                                                    | 98.5%                                                                                                   | 93.4%                                                                                                                                                          | 98.6%                                                                                                   | 93.5%                                                                                                                                                     | 98.6%                                                                                                   | 93.5%                                                                                                                                                          | 98.7%                                                                                                   |
| Absorption correction                                 | multi-scan                                                                                              | multi-scan                                                                                                                                               | multi-scan                                                                                              | multi-scan                                                                                                                                                     | multi-scan                                                                                              | multi-scan                                                                                                                                                | multi-scan                                                                                              | multi-scan                                                                                                                                                     | multi-scan                                                                                              |
| T <sub>mins</sub> T <sub>max</sub>                    | 0.977, 0.966                                                                                            | 0.978, 0.967                                                                                                                                             | 0.978, 0.967                                                                                            | 0.978, 0.967                                                                                                                                                   | 0.978, 0.967                                                                                            | 0.978, 0.967                                                                                                                                              | 0.978, 0.967                                                                                            | 0.978, 0.967                                                                                                                                                   | 0.978, 0.967                                                                                            |
| Refinement method                                     | Full matrix LSQ                                                                                         | Full matrix LSQ                                                                                                                                          | Full matrix LSQ                                                                                         | Full matrix LSQ                                                                                                                                                | Full matrix LSQ                                                                                         | Full matrix LSQ                                                                                                                                           | Full matrix LSQ                                                                                         | Full matrix LSQ                                                                                                                                                | Full matrix LSQ                                                                                         |
| Reflections/ restraints/ parameters                   | 1539 / 25 / 133                                                                                         | 2930 / 0 / 263                                                                                                                                           | 1544 / 25 / 133                                                                                         | 2944 / 0 / 263                                                                                                                                                 | 1554 / 25 / 133                                                                                         | 2954 / 0 / 263                                                                                                                                            | 1558 / 25 / 133                                                                                         | 2959 / 0 / 263                                                                                                                                                 | 1563 / 25 / 133                                                                                         |
| Goof on F <sup>2</sup>                                | 1.056                                                                                                   | 1.055                                                                                                                                                    | 1.051                                                                                                   | 1.076                                                                                                                                                          | 1.087                                                                                                   | 1.075                                                                                                                                                     | 1.079                                                                                                   | 1.046                                                                                                                                                          | 1.024                                                                                                   |
| R [ <i>I</i> > 2σ( <i>I</i> )]                        | <i>R</i> 1 = 0.0429<br><i>wR</i> 2 = 0.1061<br>[1303 data; <i>I</i> > 2σ( <i>I</i> )]                   | <i>R</i> 1 = 0.0493<br><i>wR</i> 2 = 0.1195<br>[2292 data; <i>I</i> > 2σ( <i>I</i> )]                                                                    | <i>R</i> 1 = 0.0433<br><i>wR</i> 2 = 0.1051<br>[1284 data; <i>I</i> > 2σ( <i>I</i> )]                   | <i>R</i> 1 = 0.0519<br><i>wR</i> 2 = 0.1233<br>[2249 data; <i>I</i> > 2σ( <i>I</i> )]                                                                          | <i>R</i> 1 = 0.0457<br><i>wR</i> 2 = 0.1100<br>[1290 data; <i>I</i> > 2σ( <i>I</i> )]                   | <i>R</i> 1 = 0.0536<br><i>wR</i> 2 = 0.1342<br>[2216 data; <i>I</i> > 2σ( <i>I</i> )]                                                                     | <i>R</i> 1 = 0.0460<br><i>wR</i> 2 = 0.1144<br>[1247 data; <i>I</i> > 2σ( <i>I</i> )]                   | <i>R</i> 1 = 0.0555<br><i>wR</i> 2 = 0.1333<br>[2158 data; <i>I</i> > 2σ( <i>I</i> )]                                                                          | <i>R</i> 1 = 0.0477<br><i>wR</i> 2 = 0.1119<br>[1211 data; <i>I</i> > 2σ( <i>I</i> )]                   |
| R (all data)                                          | <i>R</i> 1 = 0.0507<br><i>wR</i> 2 = 0.1144                                                             | <i>R</i> 1 = 0.0635<br><i>wR</i> 2 = 0.1341                                                                                                              | <i>R</i> 1 = 0.0519<br><i>wR</i> 2 = 0.1134                                                             | <i>R</i> 1 = 0.0680<br><i>wR</i> 2 = 0.1393                                                                                                                    | <i>R</i> 1 = 0.0557<br><i>wR</i> 2 = 0.1195                                                             | <i>R</i> 1 = 0.0716<br><i>wR</i> 2 = 0.1557                                                                                                               | <i>R</i> 1 = 0.0583<br><i>wR</i> 2 = 0.1281                                                             | <i>R</i> 1 = 0.0778<br><i>wR</i> 2 = 0.1576                                                                                                                    | <i>R</i> 1 = 0.0628<br><i>wR</i> 2 = 0.1258                                                             |
| Extinction                                            | 0.0027(10)                                                                                              | -                                                                                                                                                        | 0.0032(9)                                                                                               | -                                                                                                                                                              | 0.0029(9)                                                                                               | -                                                                                                                                                         | 0.0023(10)                                                                                              | -                                                                                                                                                              | 0.0027(9)                                                                                               |
| ρ <sub>mins</sub> ρ <sub>max</sub> / eÅ <sup>-3</sup> | 0.110, -0.128                                                                                           | 0.150, -0.130                                                                                                                                            | 0.105, -0.106                                                                                           | 0.145, -0.139                                                                                                                                                  | 0.115, -0.103                                                                                           | 0.129, -0.129                                                                                                                                             | 0.105, -0.105                                                                                           | 0.150, -0.132                                                                                                                                                  | 0.106, -0.105                                                                                           |

 cd = cooling down, hu = heating up. Columns coloured in orange stand for data present in the **Table S3** in ESI.



## Powder patterns of perfluorodecalins and decalins

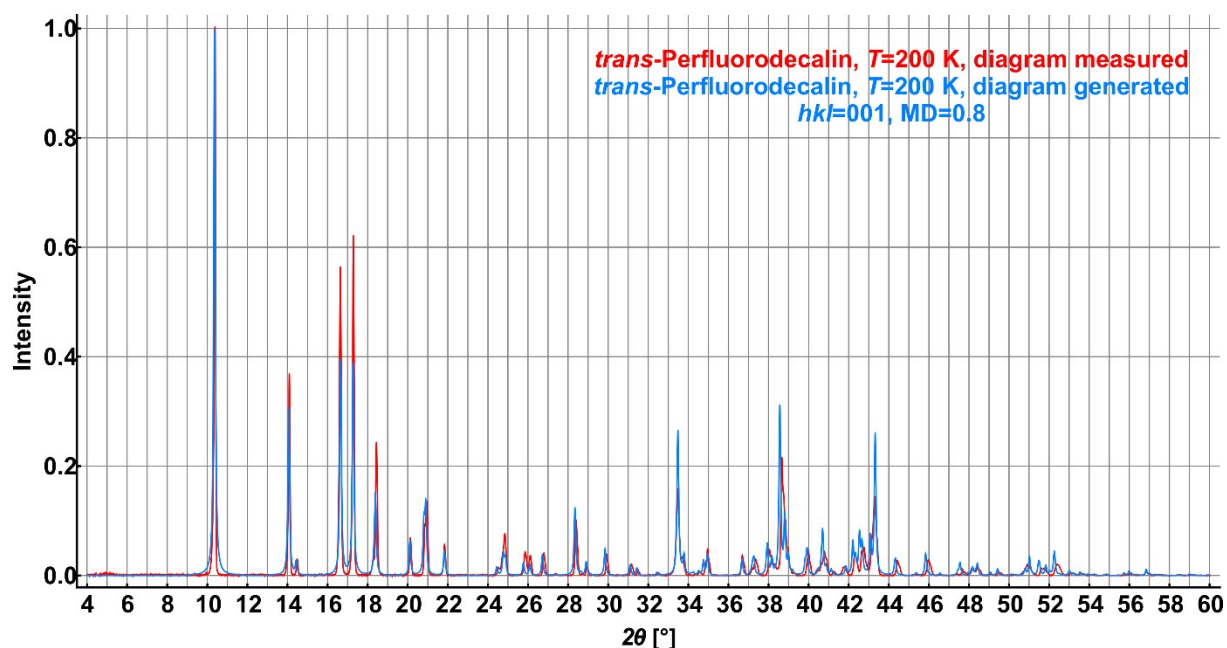

**Fig. S1.** Overlay of experimental and generated powder diagrams for *trans*-perfluorodecalin. Relatively good fit is observed when texture effect is included in generated diagrams for  $MD=0.8$  (March-Dollase parameter) with enhanced intensities of  $hkl=001$  group of reflections – crystals form plates with index of the base face equal to (001).

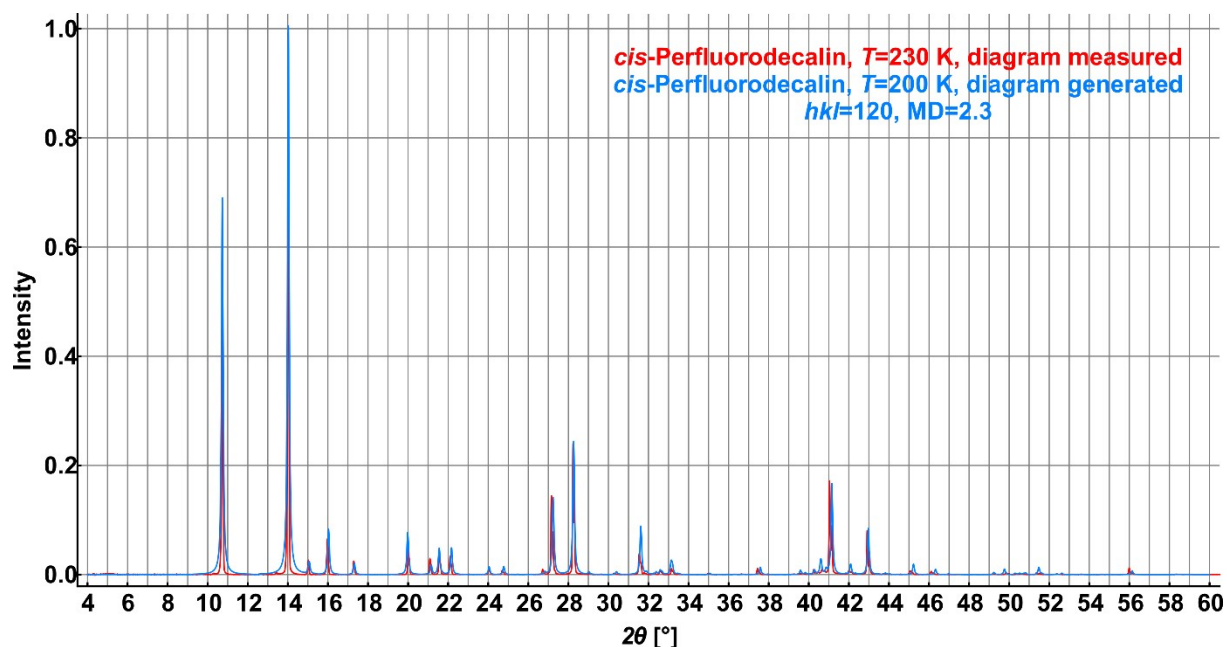

**Fig. S2.** Overlay of experimental and generated powder diagrams for *cis*-perfluorodecalin. Relatively good fit is observed when texture effect is included in generated diagrams for  $MD=2.3$  (March-Dollase parameter) with decreased intensities of  $hkl=120$  group of reflections – crystals form needles elongated the [120] direction and parallel to the capillary.

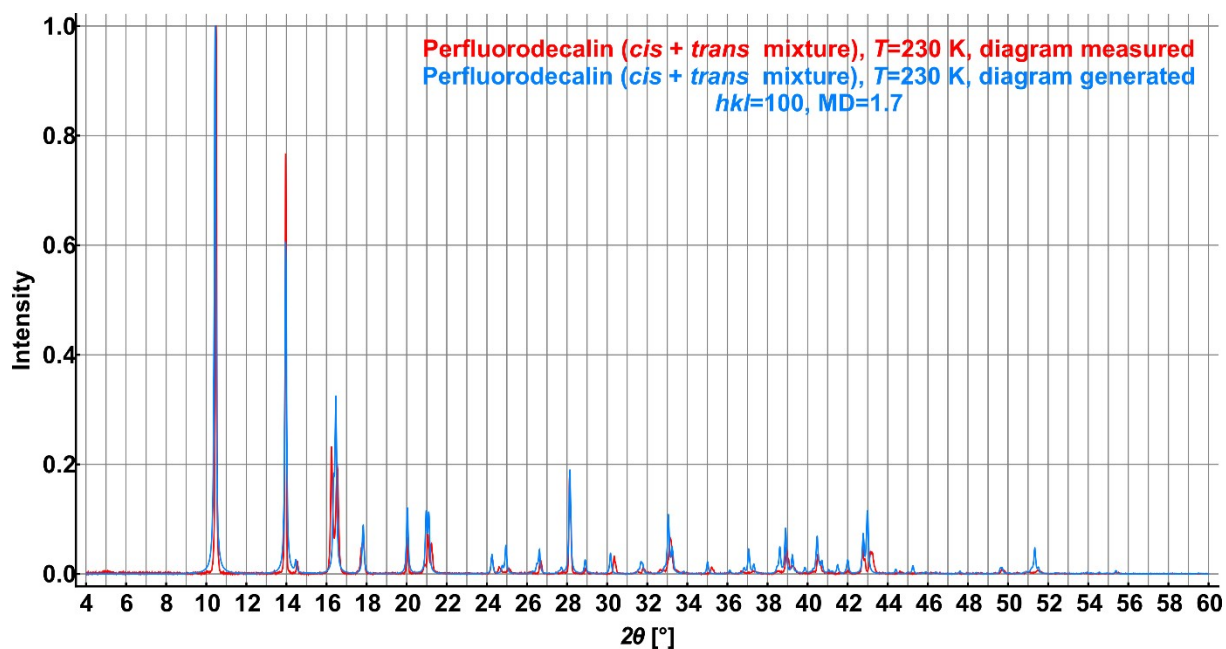

**Fig. S3.** Overlay of experimental and generated powder diagrams for disordered form of *trans*-perfluorodecalin. Relatively good fit is observed when texture effect is included in generated diagrams for  $MD=1.7$  (March-Dollase parameter) with decreased intensities of  $hkl=100$  group of reflections – crystals form needles elongated the  $[100]$  direction and parallel to the capillary.

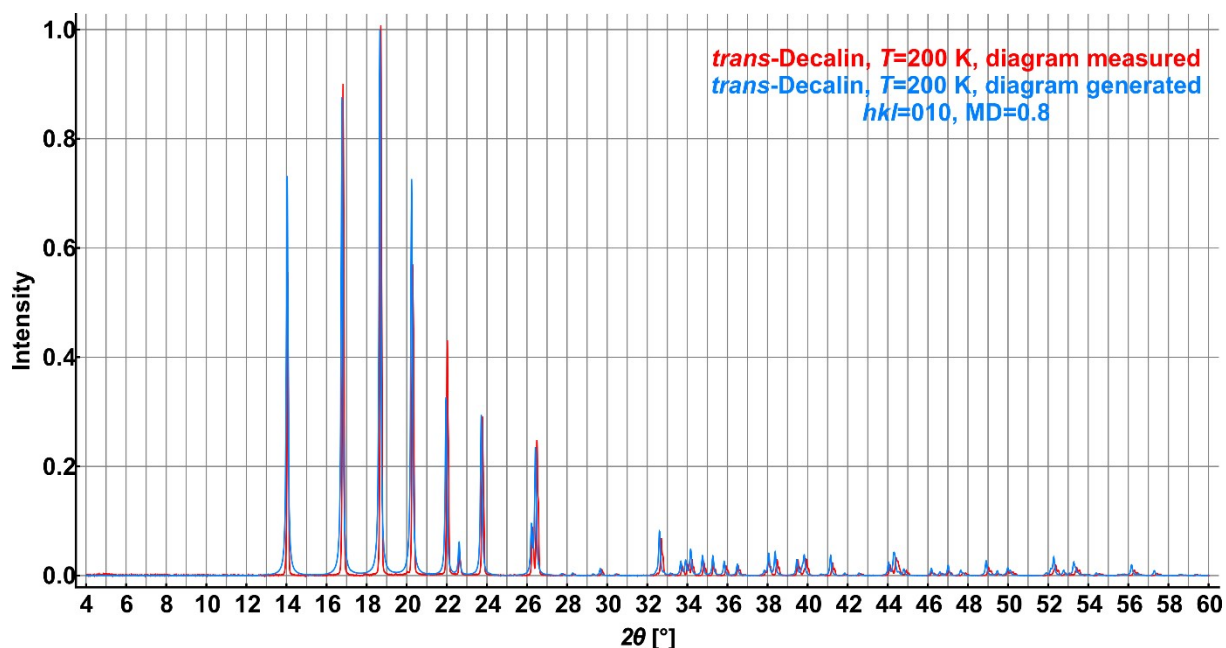

**Fig S4.** Overlay of experimental and generated powder diagrams for *trans*-decalin. Relatively good fit is observed when texture effect is included in generated diagrams for  $MD=0.8$  (March-Dollase parameter) with enhanced intensities of  $hkl=010$  group of reflections – crystals form plates with index of the base face equal to  $(010)$ .

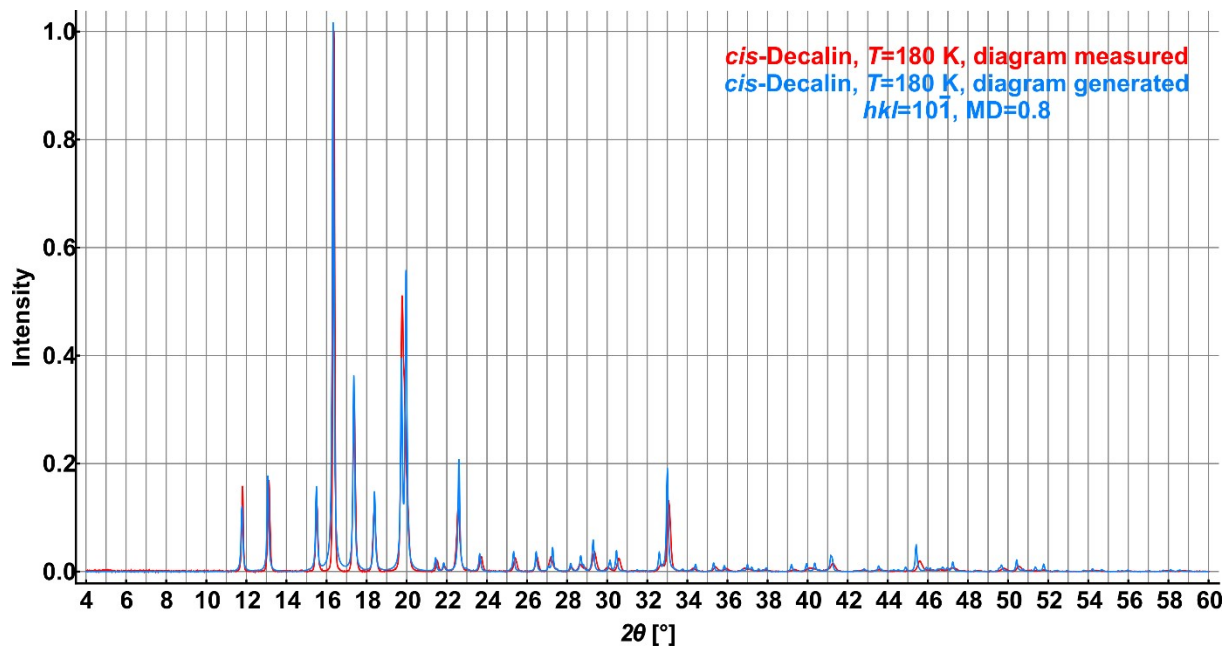

**Fig. S5.** Overlay of experimental and generated powder diagrams for *cis*-decalin. Relatively good fit is observed when texture effect is included in generated diagrams for  $MD=0.8$  (March-Dollase parameter) with enhanced intensities of  $hkl=10-1$  group of reflections – crystals form plates with index of the base face equal to (10-1).
